# Supplementary material for: The Spermidine Synthase Gene SPD1: A Novel Auxotrophic Marker for Chlamydomonas Reinhardtii Designed by Enhanced CRISPR/Cas9 Gene Editing
Source: Preprints.org preprint supplement (doi:10.20944/preprints202201.0211.v1), 2022-01-14
Supplement: Supplementary file 3 [file supplementary]

*Supplementary Material*

The spermidine synthase gene *SPD1*: A novel auxotrophic marker for *Chlamydomonas reinhardtii* designed by enhanced CRISPR/Cas9 gene editing

**Robert A. Freudenberg 1, Luisa Wittemeier 1, Alexander Einhaus 1, Thomas Baier 1, Olaf Kruse 1,***

1 Bielefeld University, Faculty of Biology, Center for Biotechnology (CeBiTec), Universitätsstrasse 27, 33615 Bielefeld, Germany; r.freude@uni-bielefeld.de (R.A.F.); luisa.wittemeier@uni-bielefeld.de (L.W.); alexander.einhaus@uni-bielefeld.de (A.E.); thomas.baier@uni-bielefeld.de (T.B.)

***** Correspondence: olaf.kruse@uni-bielefeld.de

**Table S1:** Table with all tested sgRNA target sites (including PAM), of which the ones used for transformation are highlighted with bold letters.

| **Gene** | **Phytozome identifier** | **Target exon** | **Target site (5’-3’)** | **GC content (%)** |
| --- | --- | --- | --- | --- |
| *STA6* | Cre03.g188250 | 4 | CAGGCGATAGTTGGCGCCCAGGG | 65 |
| TTGGCACGCTTCTTGGTCAGAGG | 55 |
| **CAAGAAGCGTGCCAAGCCGGCGG** | 65 |
| *SPD1* | Cre12.g558450 | 2 | TCGCCAATGTGGCCTGGGCAGGG | 65 |
| **TCTCCTTAACTTTCAGGGAGAGG** | 45 |
| CACAGGCGATCAACGATGGCTGG | 60 |

**Table S2:** Table with the most important primers that were used during this study. Capitalized letters indicate BbsI recognition and cut sites as well as BciVI recognition sites.

| **Name** | **Use** | **Sequence (5’-3’)** |
| --- | --- | --- |
| P102_Sta6_E4_H1_F | Amplification of homology arms | attaGAAGACatTGCCGTATCCctgaagatgcgggtgagccag |
| P103_Sta6_E4_H1_R | attaGAAGACatTTGCcagacgggtgccggcaccac |
| P104_Sta6_E4_H2_F | attaGAAGACatACTAtcgatattcccgttagcaactgcc |
| P105_Sta6_E4_H2_R | attaGAAGACatGTAAGTATCCtgtagccgcccacagacgag |
| P129_SPD1_E2_H1_F | attaGAAGACatTGCCGTATCCaaatgctcaagtcgccgacc |
| P130_SPD1_E2_H1_R | attaGAAGACatTTGCcgcctgtgggatcagtcagc |
| P131_SPD1_E2_H2_F | attaGAAGACatACTAggagattctgtaccggggca |
| P132_SPD1_E2_H2_R | attaGAAGACatGTAAGTATCCgccgtgctgctgcagaggc |
| P93_HygR_F | Sequencing/ PCR | atccggaggaactggcgcagttc |
| P94_HygR_R | gcaggctcgcgtaggaatcatcc |
| P95_FDX_F | tgacacggtgacacgcaggtatacg |
| P96_P-PSAD_R | ctgacgagggctcgtgtgacg |
| P133_SPD1_E2_S1_F | ctagggtgtatgcactccgg |
| P134_SPD1_E2_S1_R | gaggaaagggccaggcttgg |
| P167_SPD1_E2_N1_F | gctccgctactagtgctcgcc |
| P168_SPD1_E2_N1_R | ccacggcagccatggcttgc |
| P63_Sta6_3_F | gttcgggctcaggctgtgtcgacc |
| P86_Sta6_5_R | tggttcgctcctgtgccctagc |
| P163_Sta6_E4_N1_F | tggggttcacggtacagcaggc |
| P164_Sta6_E4_N2_R | gctcttgttggcggacgactgg |
| P92_Sta6_5_R | Cctcctcgaacagccacatgtactggc |
| P298_STOP_p2_F | Multi-Stop insert | attaGAAGACatgcaatgactgactagatggatccgtgcatttactaatGTCTTCatta |
| P299_STOP_p2_R | taatGAAGACattagtaaatgcacggatccatctagtcagtcattgcatGTCTTCtaat |

**Table S3**: Sequence of the synthetic *Cr*SPD1 coding sequence used in this study for complementing the ΔSPD1 mutant. 5’ and 3’ extensions (lower case letters) have been added to facilitate cloning into a MoClo level 0 acceptor vector for position B3. The RBCS2 introns are presented in lower case letters.

| **Synthetic *Cr*SPD1 for B3 (1265 bp)** |
| --- |
| gaagacaaaatgGCCAGCAAGCCCAGCCCCGGCAGCGCCGACCAGGCCATCAACGACGGCTGGTACACCGAGCTGAGCCC  CATGTGGCCCGGCCAGGGCCTGAGCCTGAAGGTGAAGGAGATCCTGTACCGCGGCAAGAGCGACTTCCAGGACGTGTGCGTGTTCGAGAGCGAGAGCATGGGCACCGTGCTGCTGCTGGACGGCGTGATCCAGGCCACCGACCGCGACGAGTTCAGCTACCAGgtgagtcgacgagcaagcccggcggatcaggcagcgtgcttgcagatttgacttgcaacgcccgcattgtgtcgacgaaggcttttggctcctctgtcgctgtctcaagcagcatctaaccctgcgtcgccgtttccatttgcagGAGATGATCGCCCACATCCCCATGTGCGCCCTGGAGCGCCCCGCCAAGAAGGTGCTGGTGGTGGGCGGCGGCGACGGCGGCGTGCTGCGCGAGCTGGCCCGCTACCCCGACGTGGAGGAGATCCACATGGCCGAGATCGACAAGATGGTGCCCGACGTGAGCAAGCAGTATTTCCCCGAGATGGCCGTGGGCTTCAGCGACCCCCGCGTGACCCTGCACATCTGCGACGGCATCAAGTACGTGGAGGACAGCCCCGAGCACAGCTACGACCTGATCGTGGTGGACAGCAGCGACCCCGTGGGCCCCGCCGAGGTGCTGTTCGAGAAGCCCTTCTTCGAGGCCCTGCACCGCGCCGTGCGCCCCGGCGGCATCGTGTGCACCCAGGCCGAGAGCCTGTGGCTGCACCTGGACATCATCAAGGCCCTGGCCGGCATGTGCAAGGAGGTGTTCGCCGGCGGCAGCGTGAGCTACGCCACCACCACCATCCCCACCTACCCCAGCGGCCAGATCGGCATGCTGGTGTGCGCCAAGgtgagtcgacgagcaagcccggcggatcaggcagcgtgcttgcagatttgacttgcaacgcccgcattgtgtcgacgaaggcttttggctcctctgtcgctgtctcaagcagcatctaaccctgcgtcgccgtttccatttgcagGCCCGCACCGAGCAGGGCGAGGGCGGCAGCGCCCCCCTGGACCCCCGCATCCCCCG  CCAGGCCGAGCCCGGCCCCCTGCCCCAGCTGGGCGTGCCCGAGCTGAAGTATTACAGCCACGAGGTGCACACCGCCGCCTTCGTGCTGCCCGTGTTCGCCAAGAAGGGCCTGGAGGGCTGCCTGACCTTCCAGaggtttgtcttc |


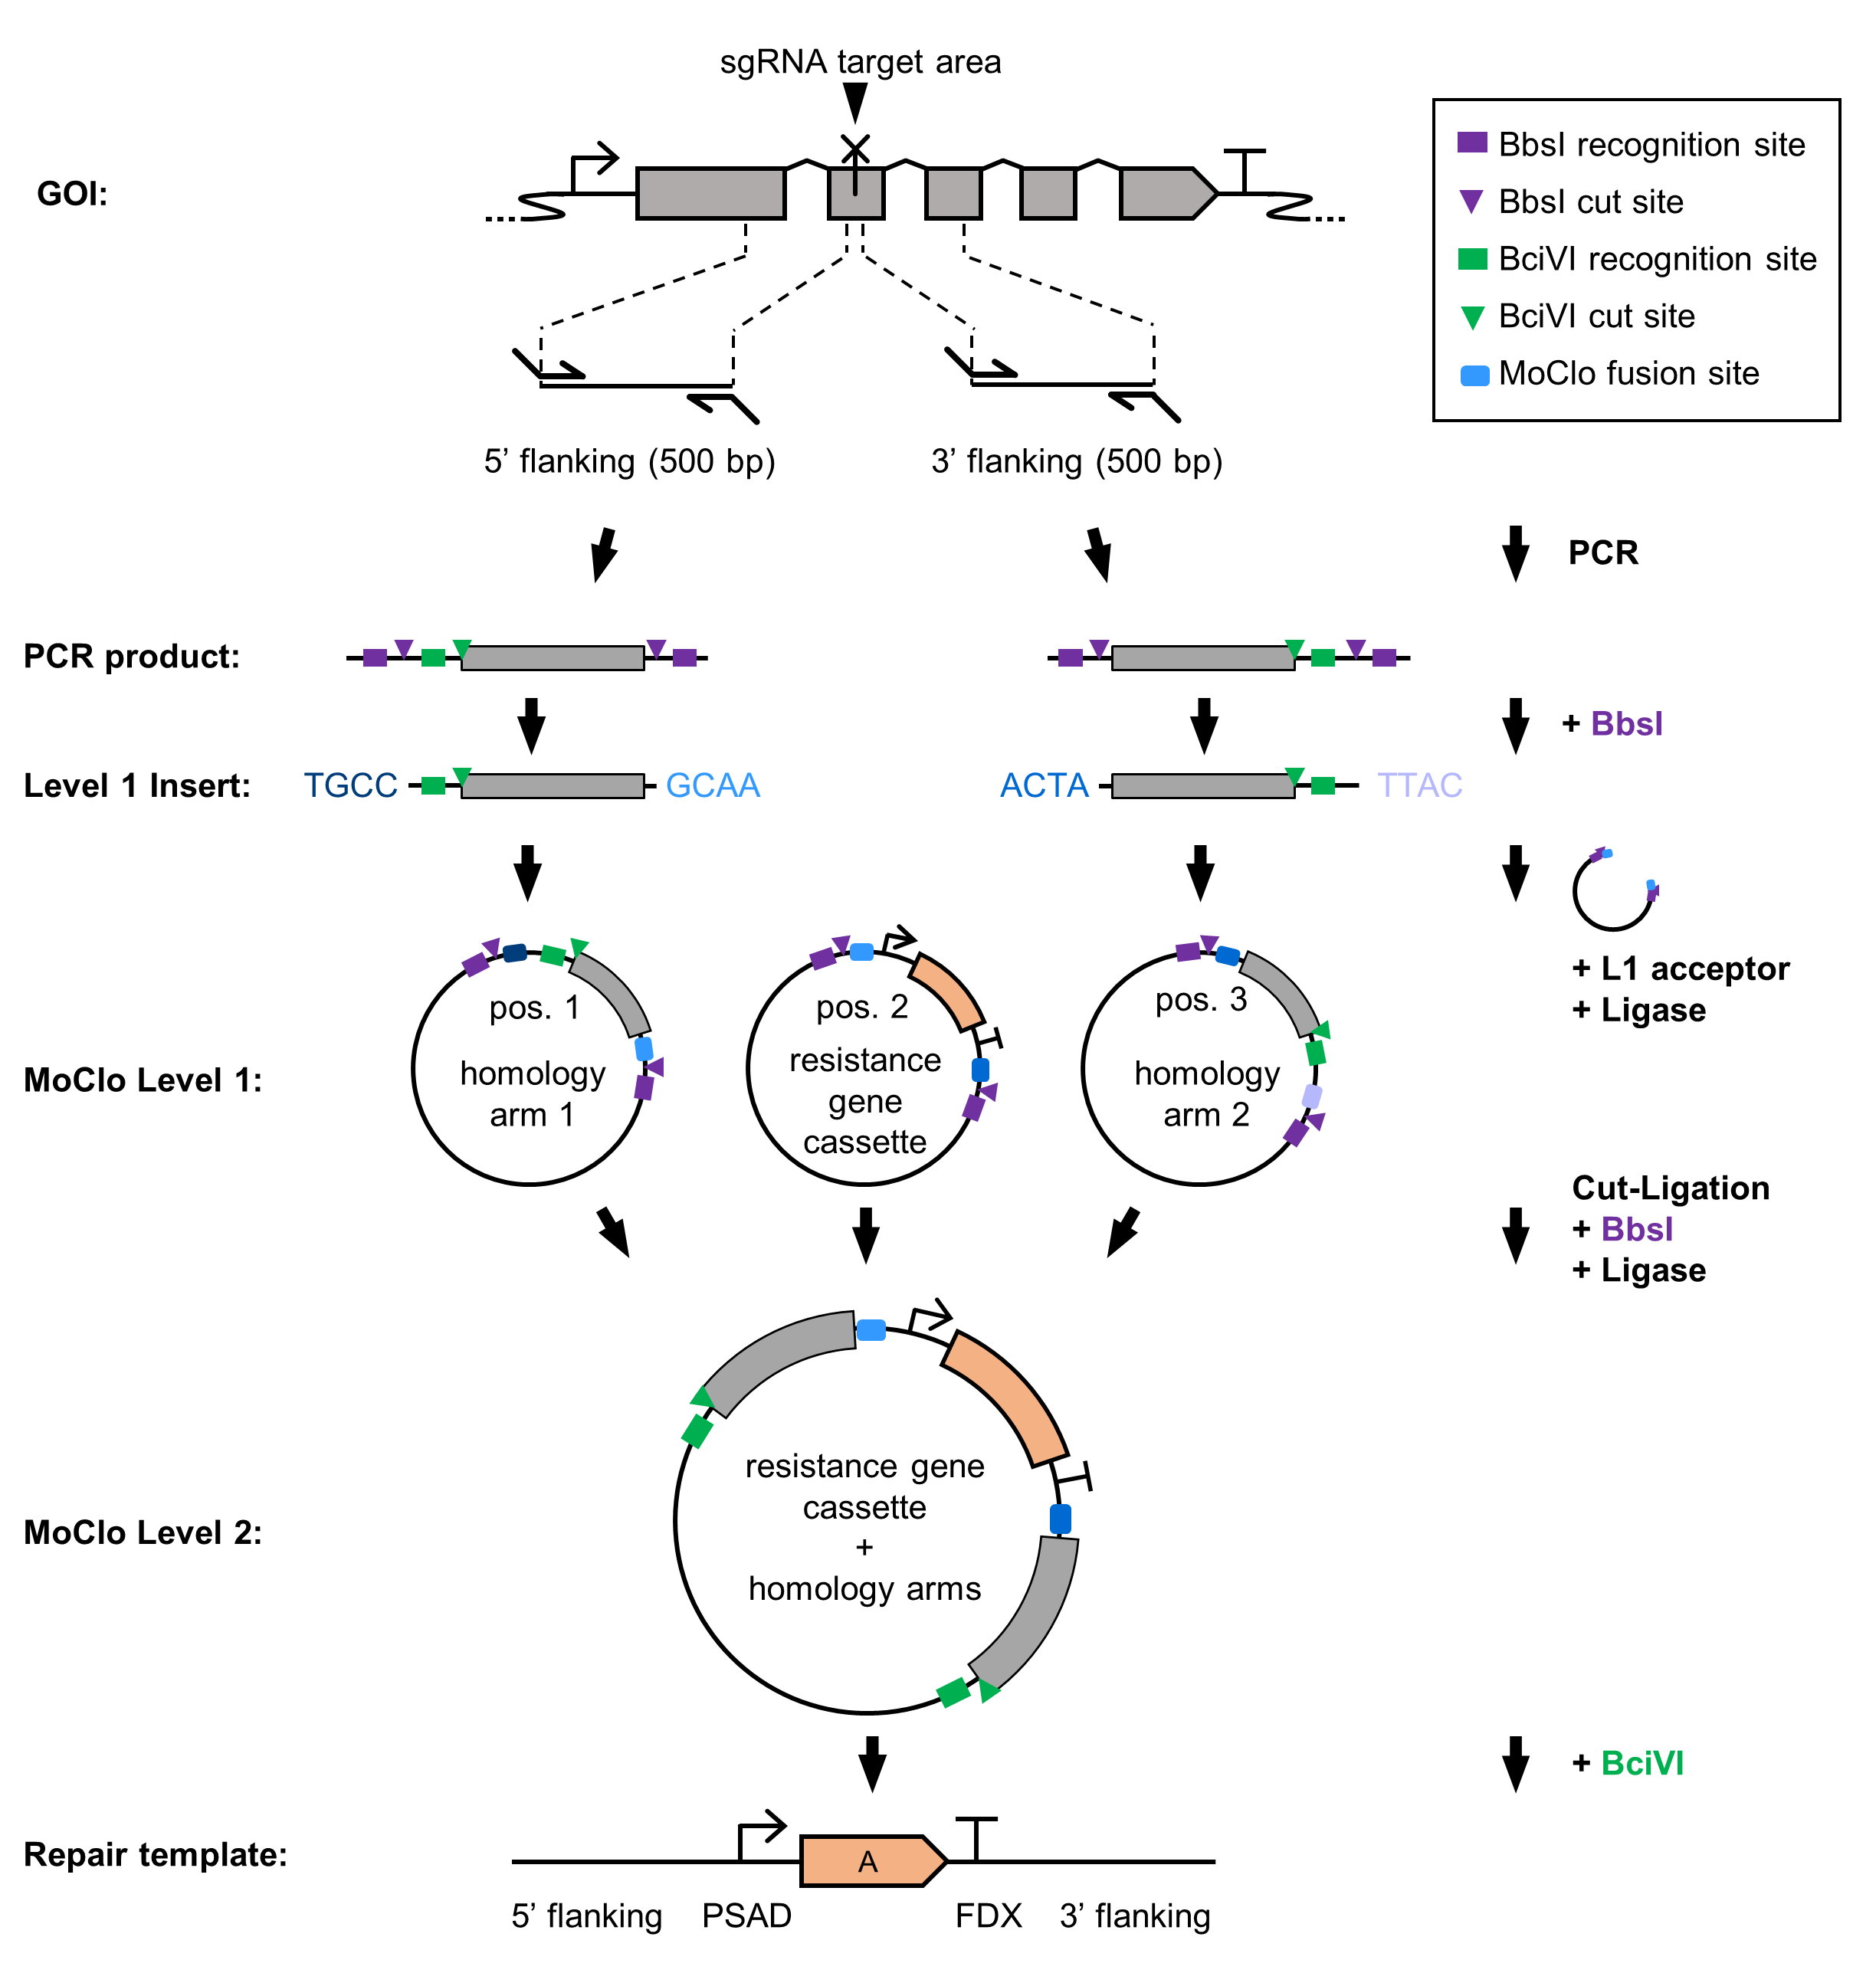


**Figure S1:** Cloning procedure for the repair template vectors using the MoClo system. The antibiotic resistance gene cassette can be exchanged for any other position 2 insert.


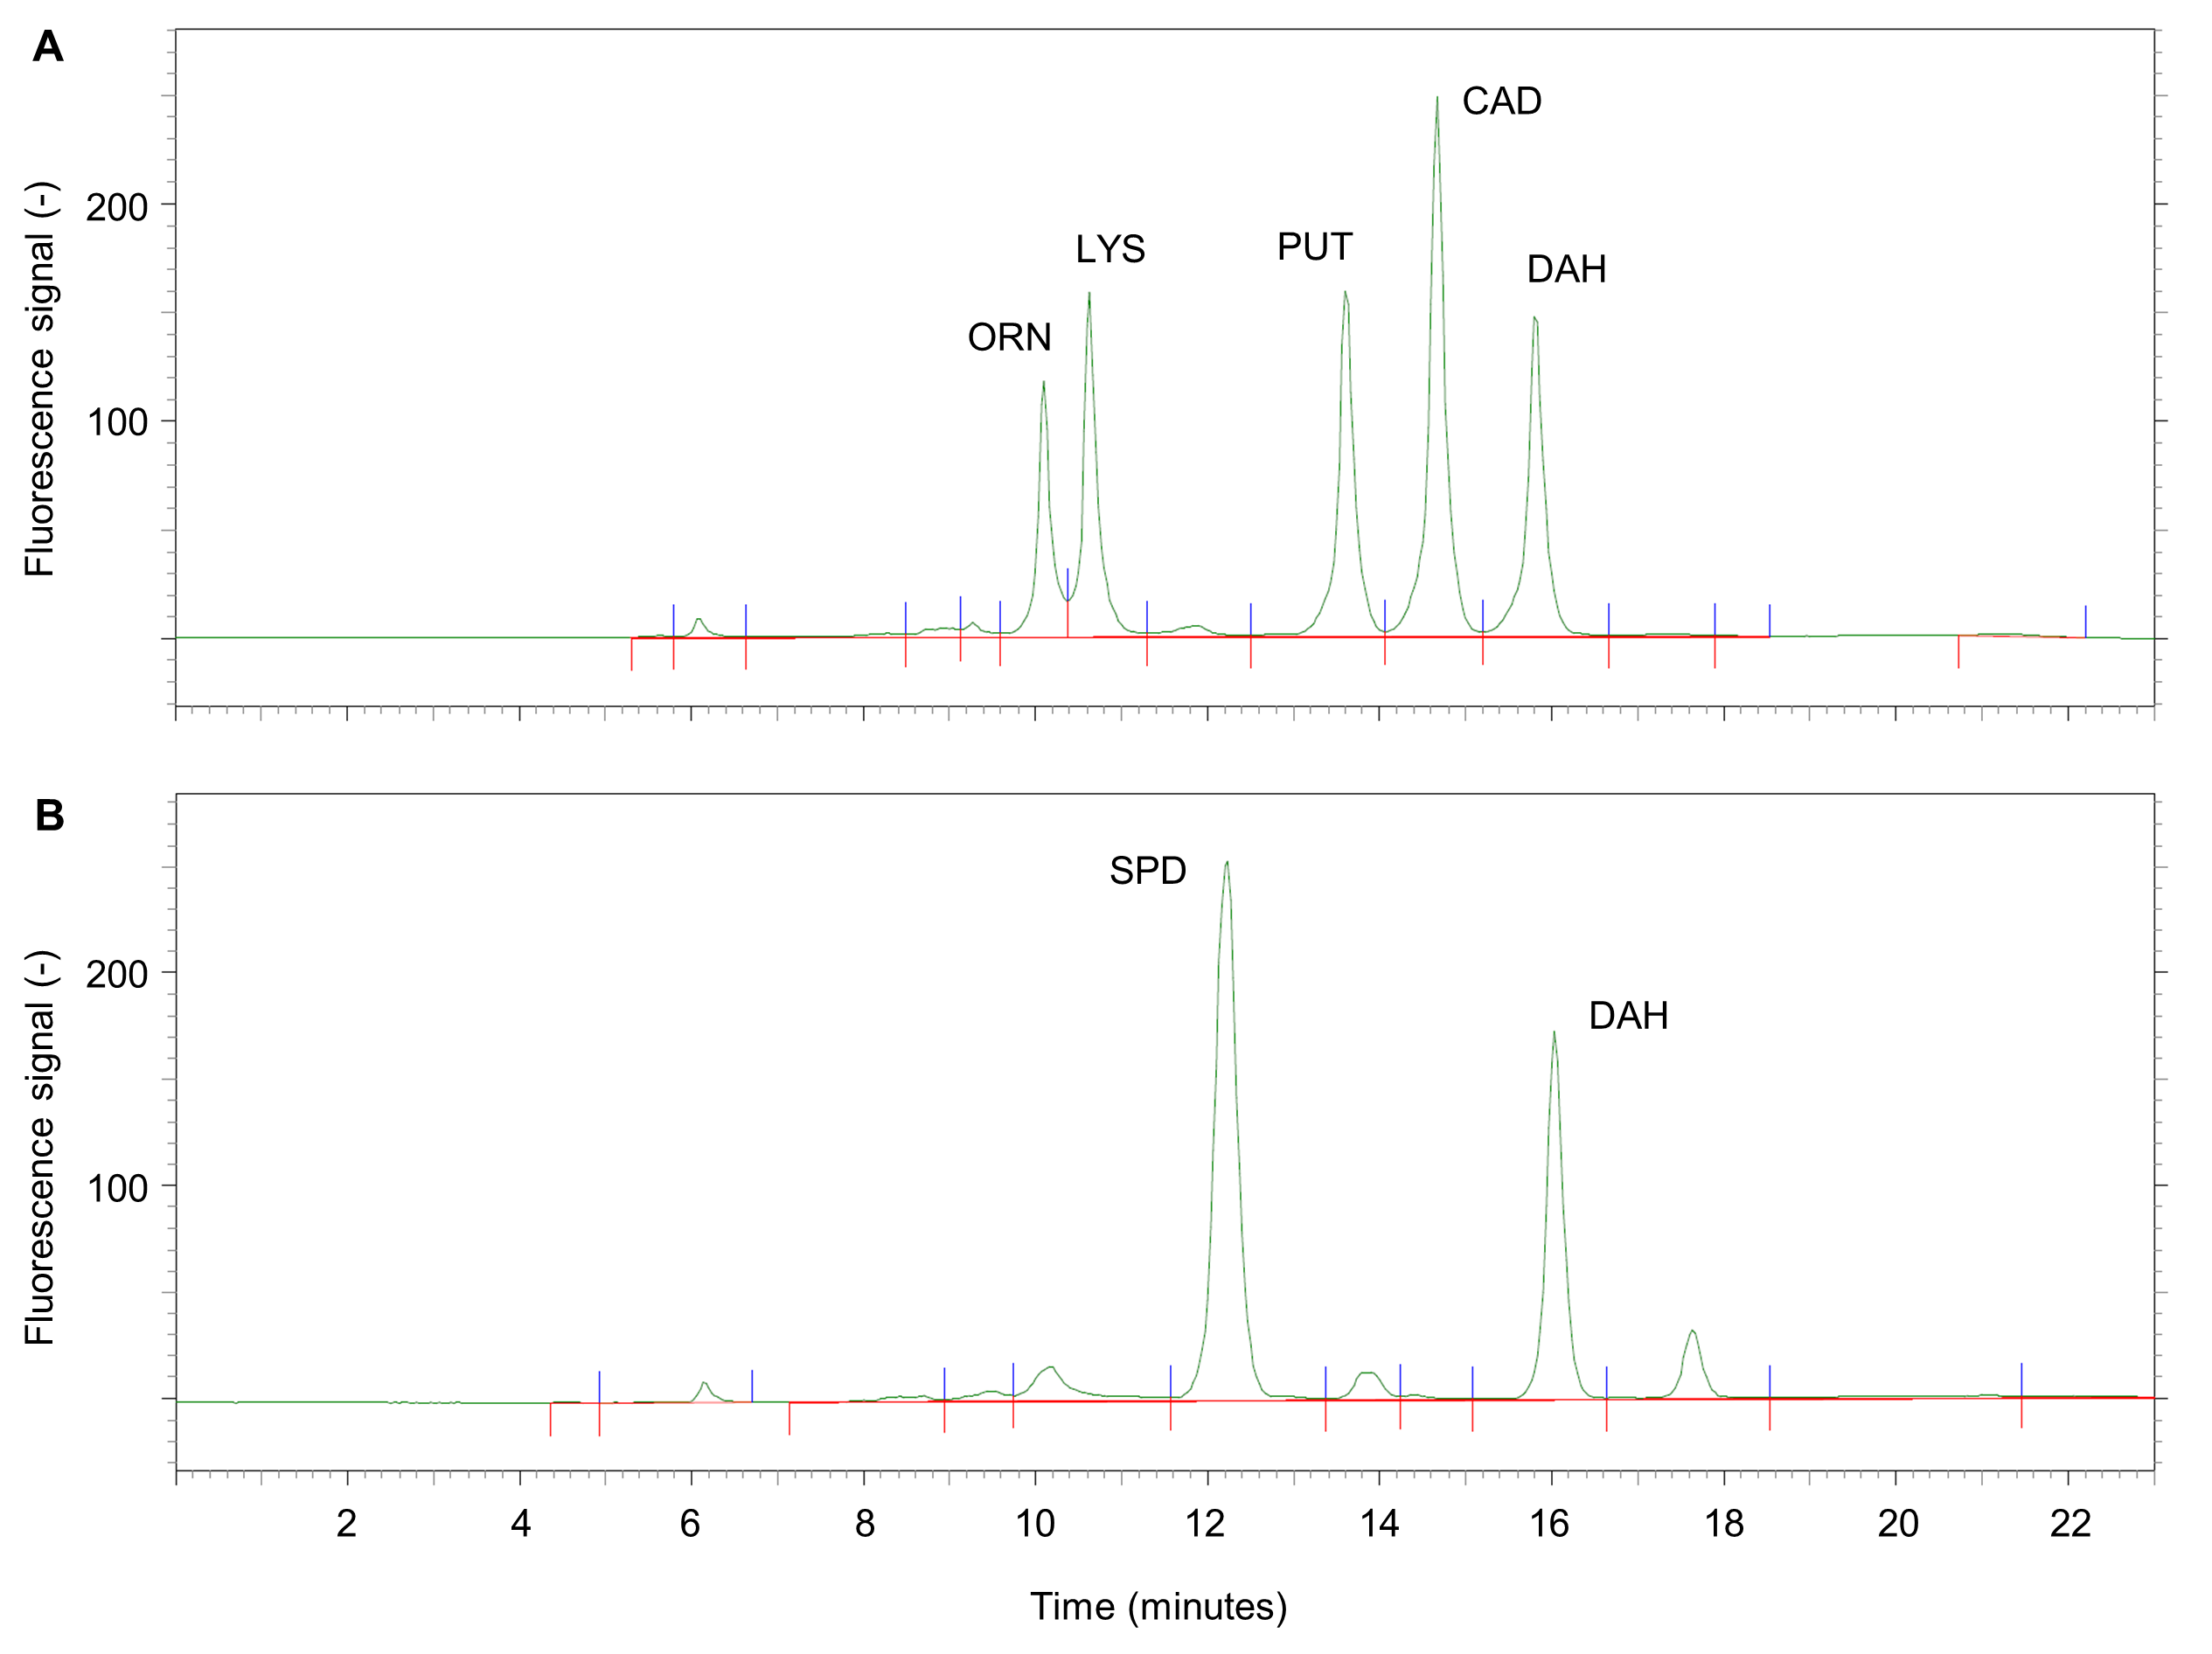


**Figure S2:** Typical fluorescence chromatograms for polyamine quantification after RP-HPLC and pre-column OPA derivatization. (**A**) Separation of 10 mg/L of each of the following compounds: Ornithine (ORN), lysine (LYS), putrescine (PUT), cadaverine (CAD) and the internal standard diaminohexane (DAH) using 5 mg/L. (**B**) Separation of 150 mg/L of spermidine (SPD) and the internal standard DAH.

**
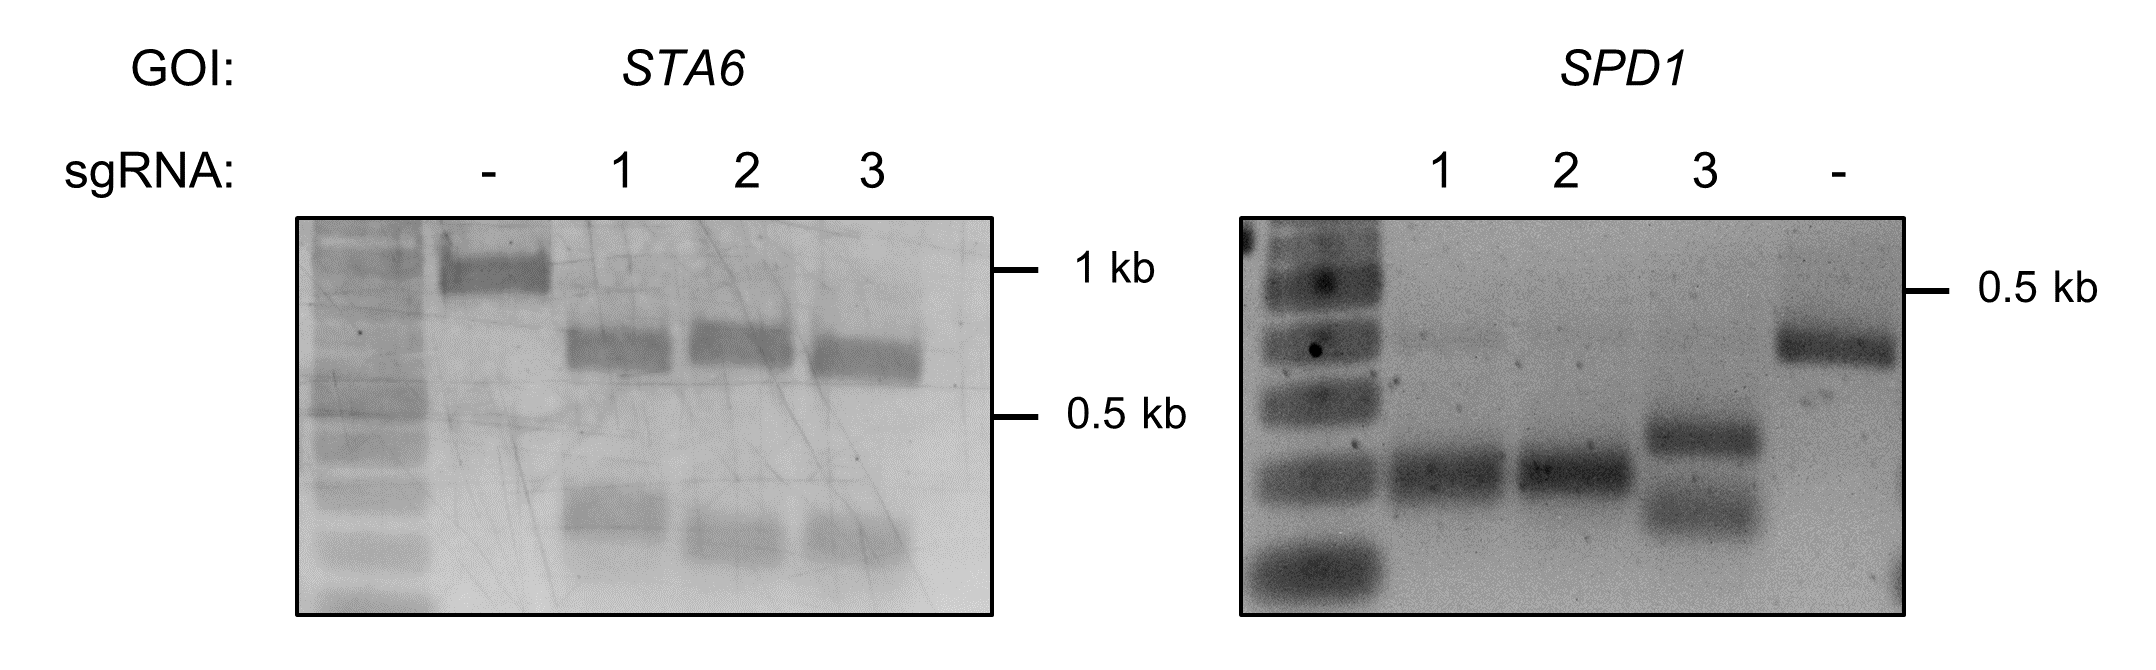
**

**Figure S3:** Agarose gel after *in vitro* digest of the sgRNA target region for *STA6* and *SPD1* using three different Cas9-sgRNA RNPs each (see Supplemental table S1).


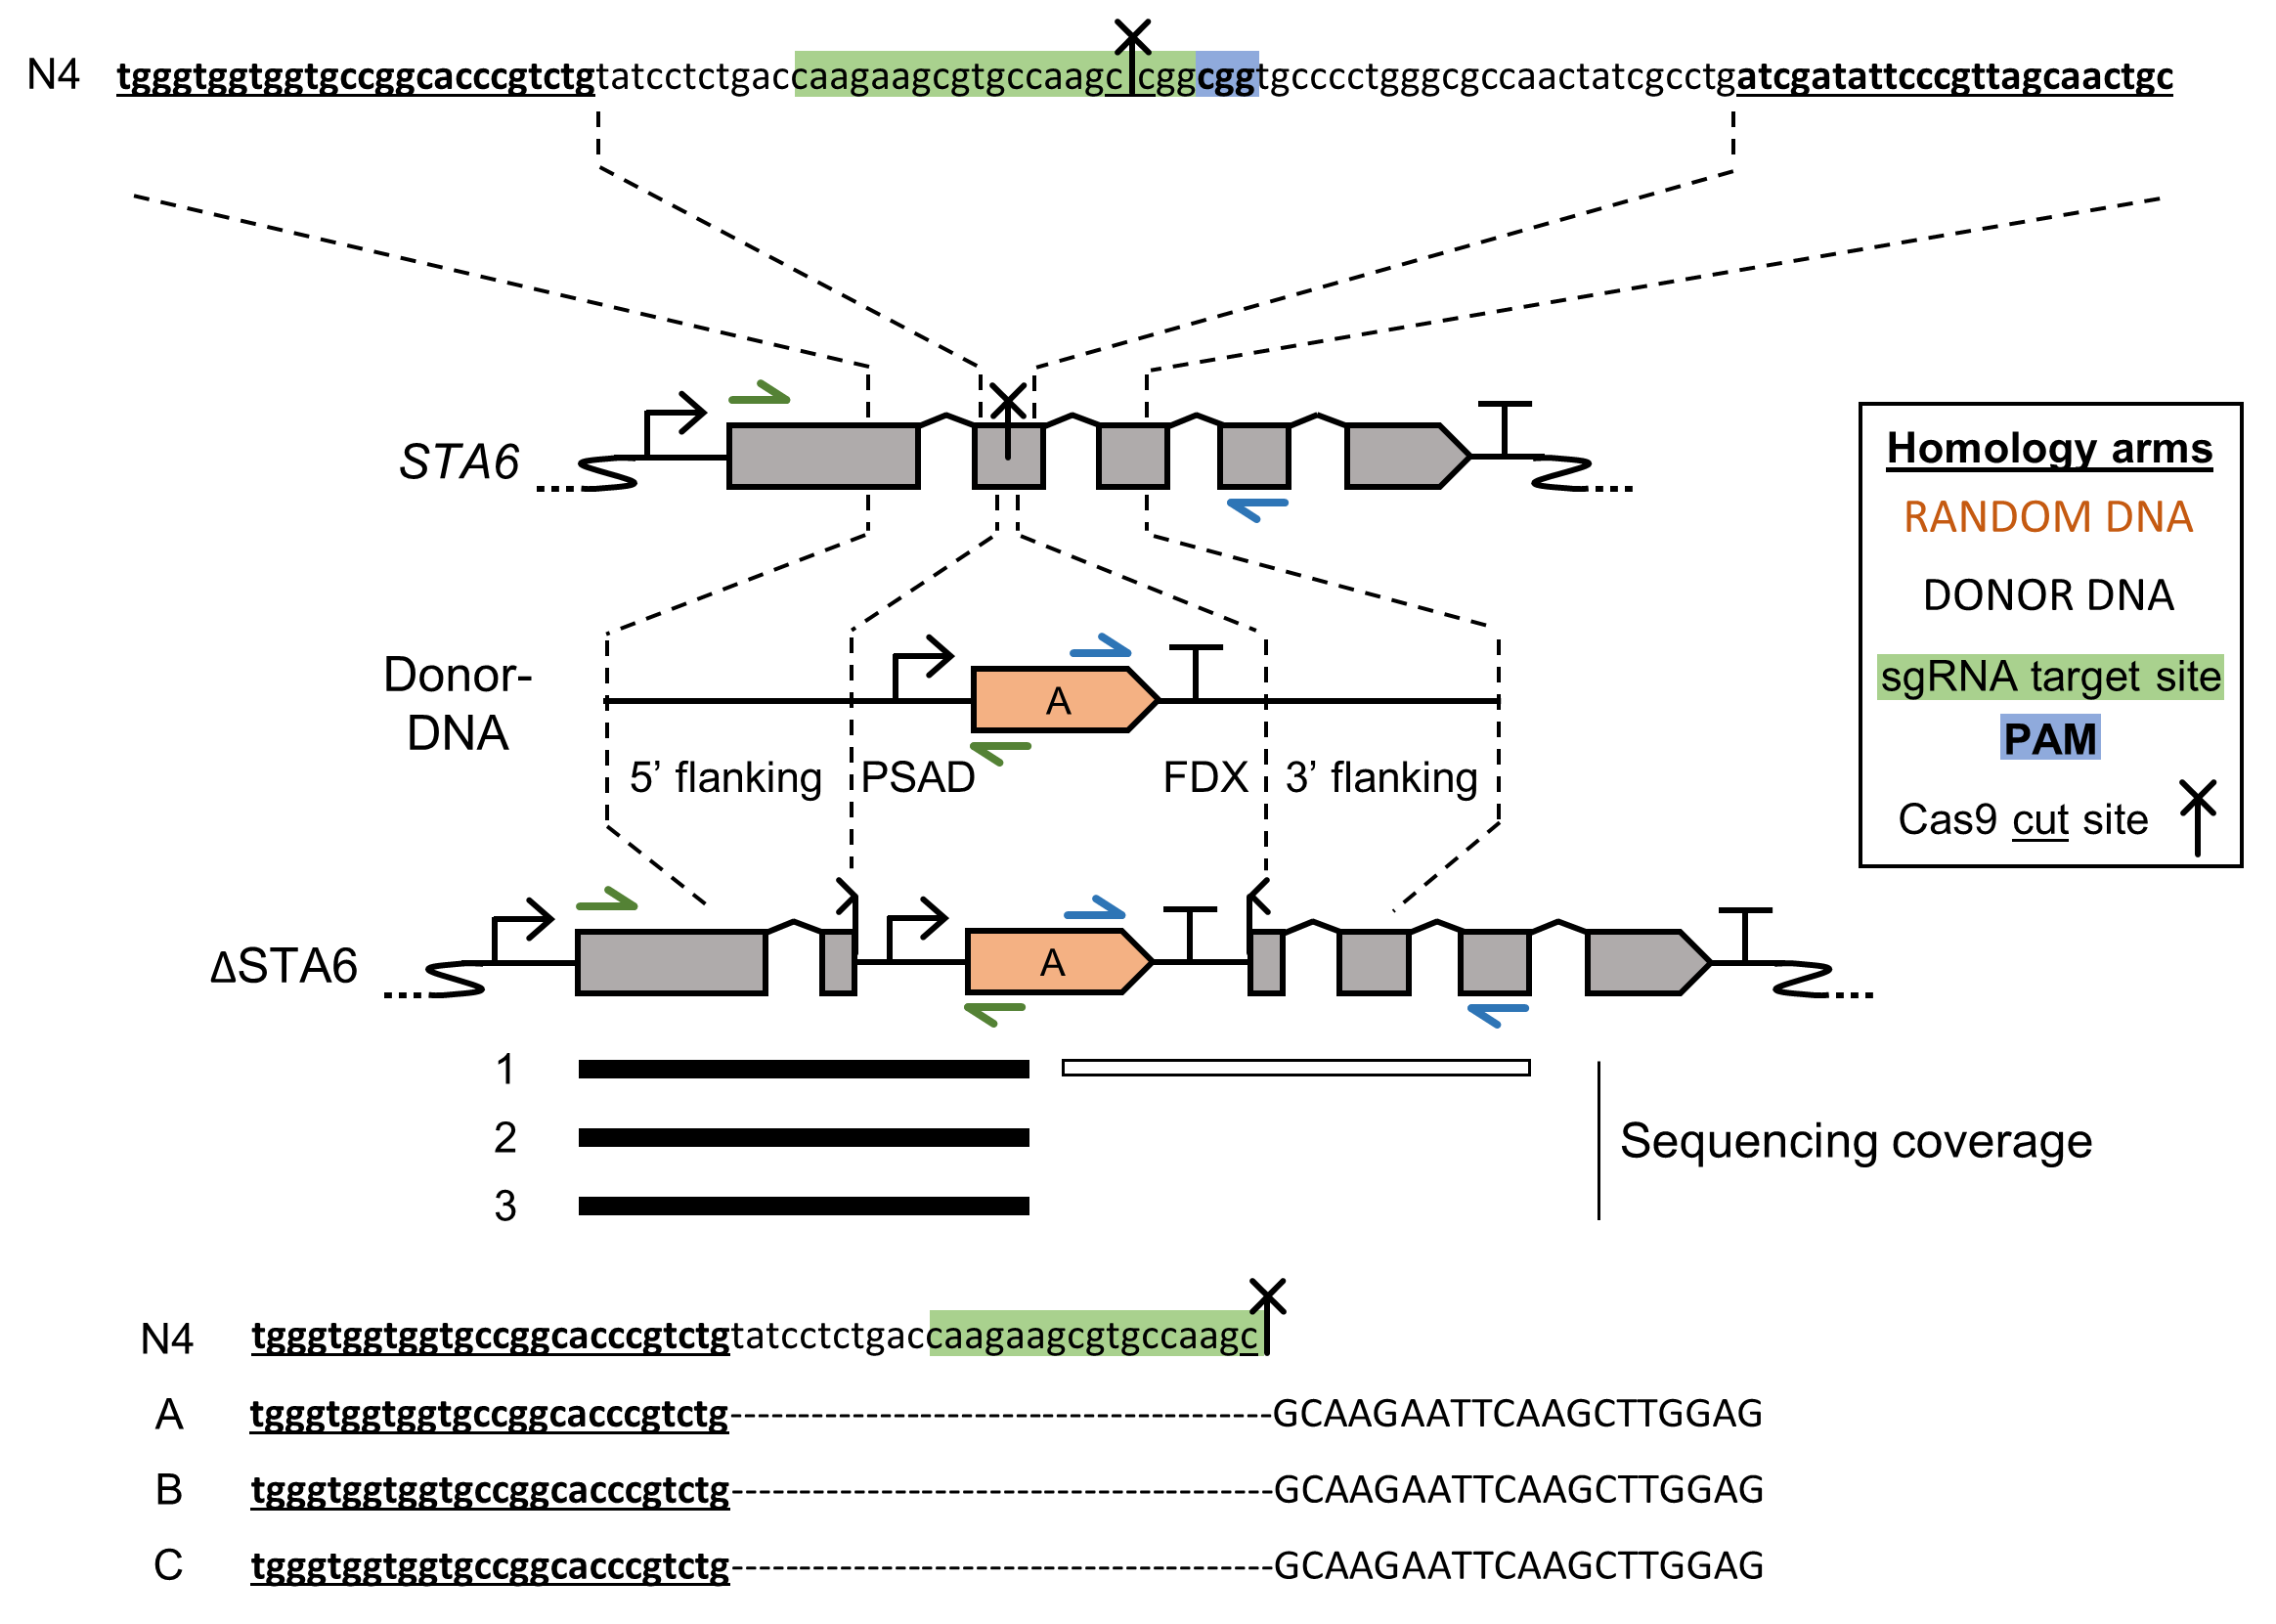


**Figure S4:** Sequencing results of the *STA6* locus after successful Cas9 edit for three different mutants. A hygromycin resistance cassette with homology arms was used as repair template. The genetic layout of the parental strain N-UVM4 is presented at the top, both in detail and as schematic (not to scale). Primers used for PCR amplification are color coded. Results are available for the green primer pair. The *STA6* locus edited via homologous recombination is depicted as well as sequencing coverage of the three PCR products. For the sgRNA target region, the sequencing results are displayed in detail at the bottom.


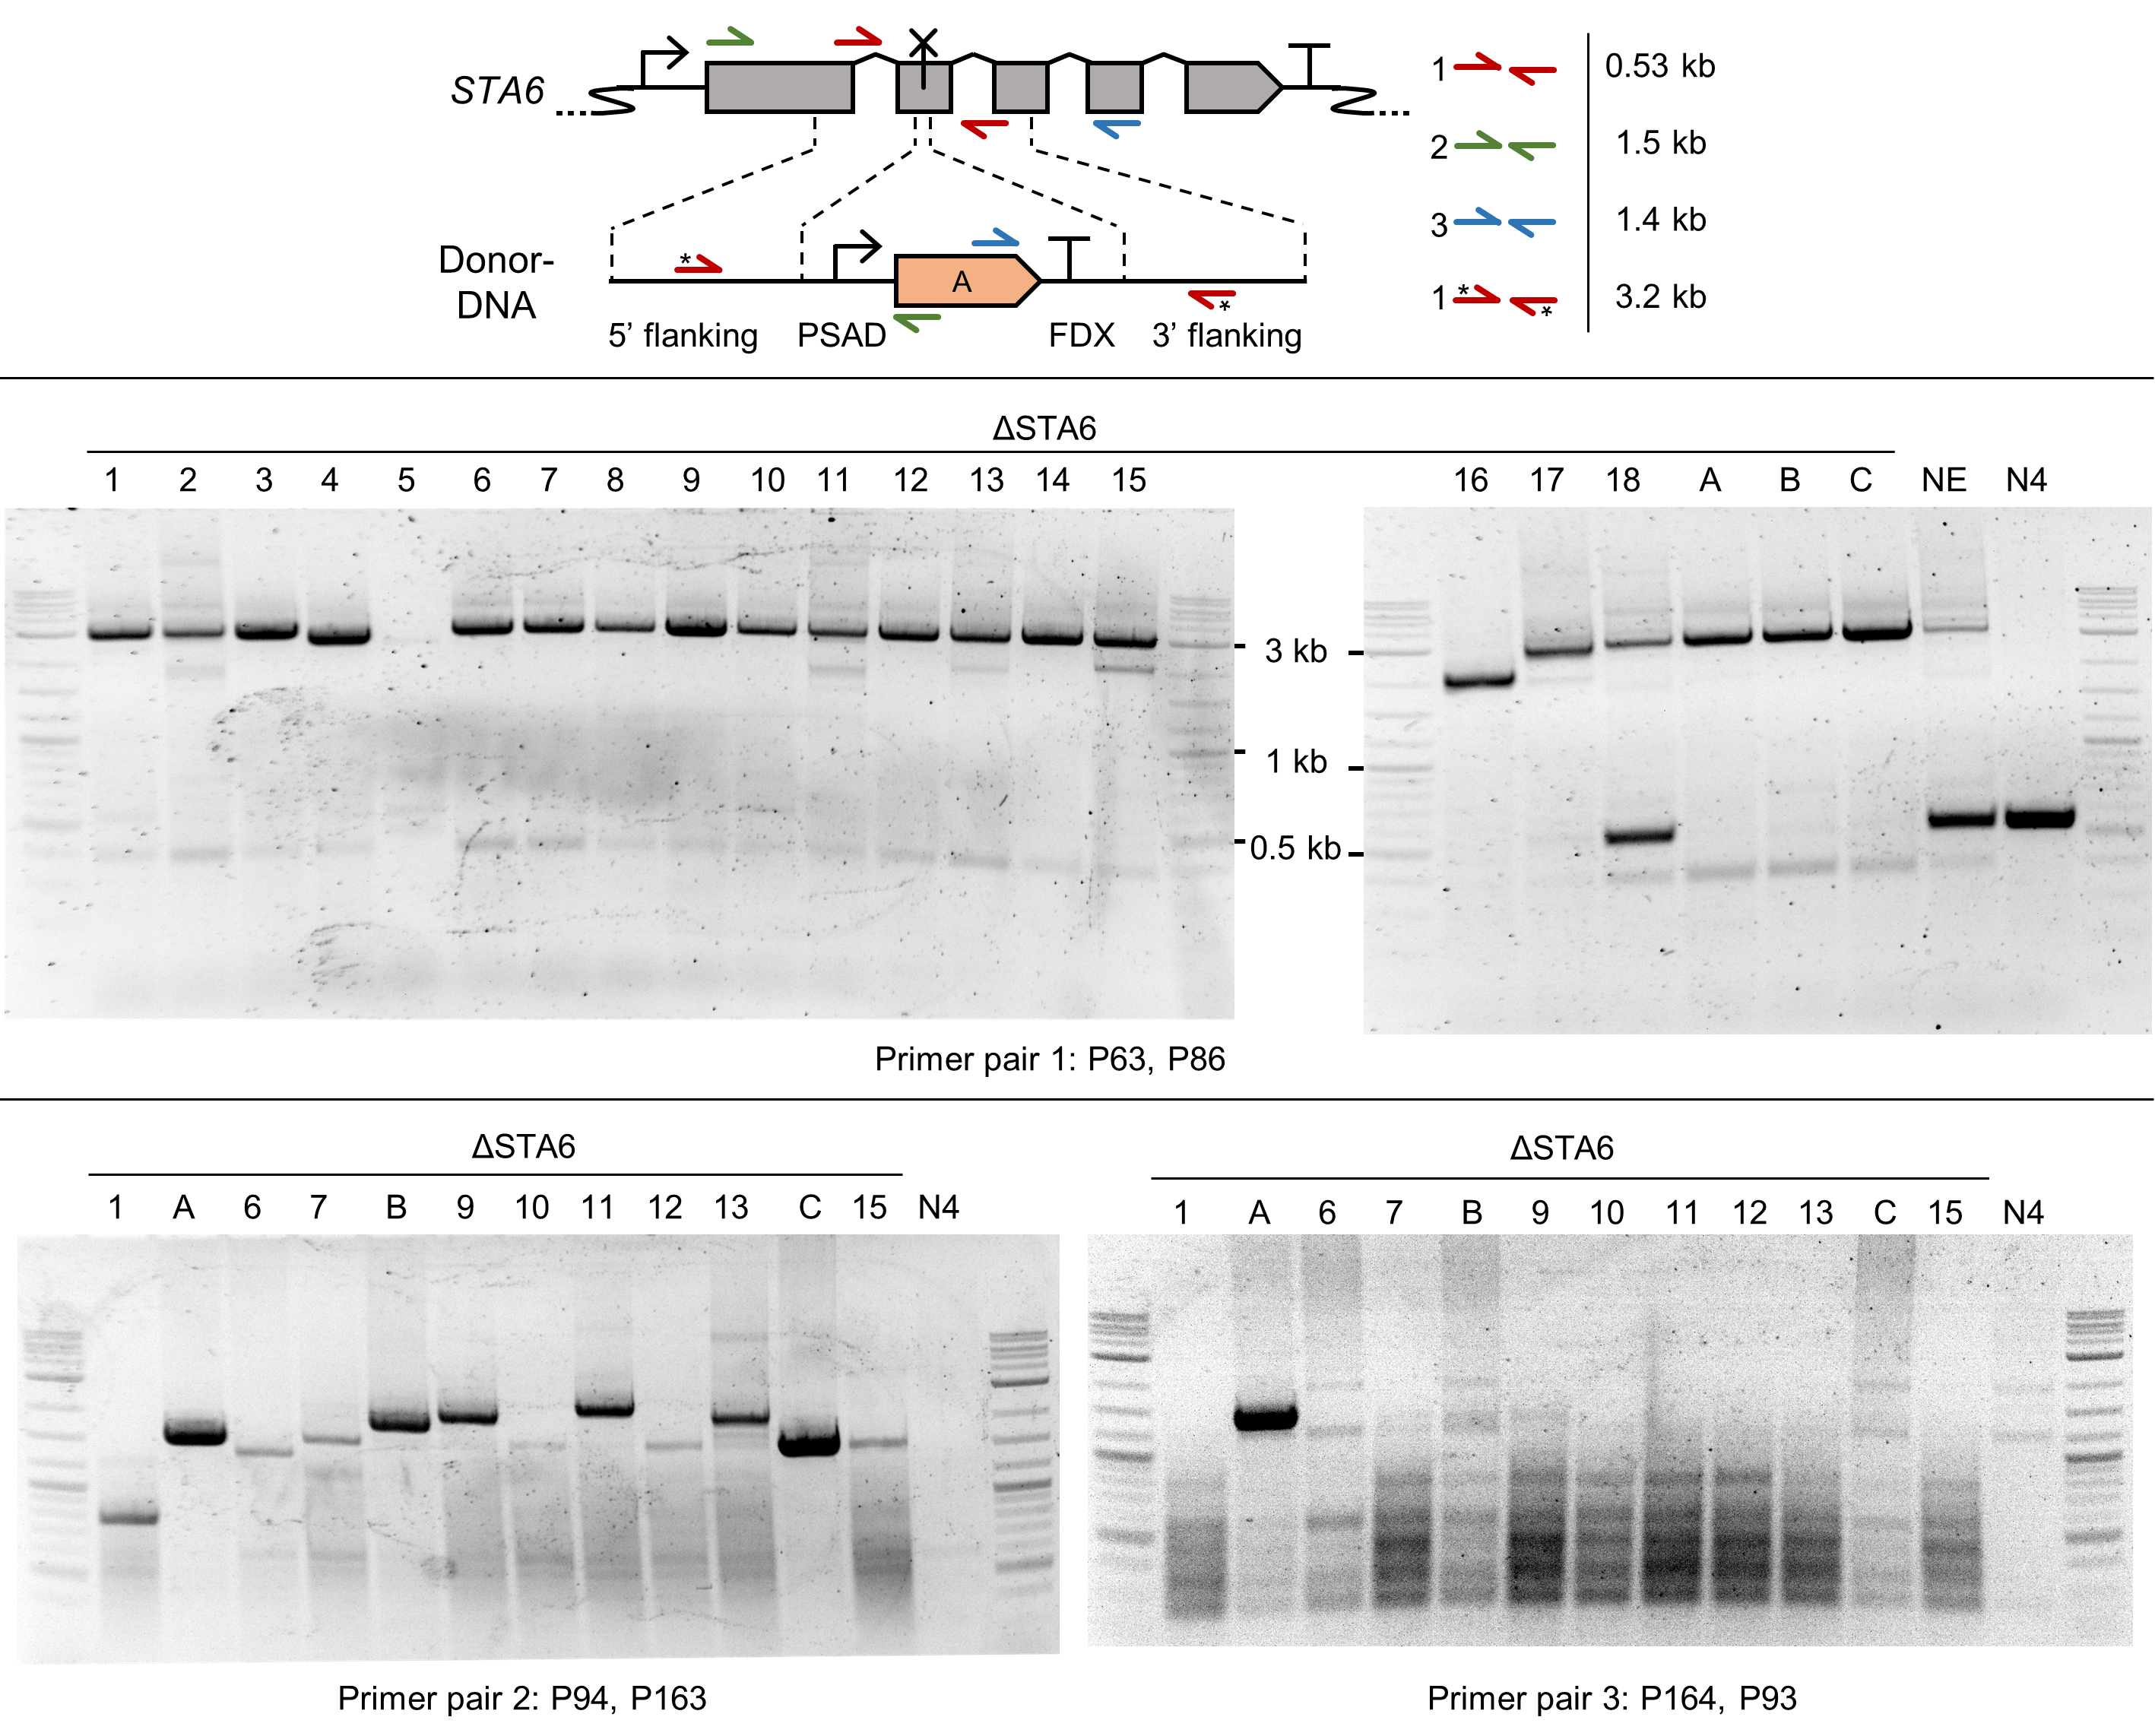


**Figure S5:** Agarose gels after cPCR of ΔSTA6 mutants using indicated primers. (N4: N-UVM4 parental strain, NE: non-edited mutant strain with hygromycin resistance)


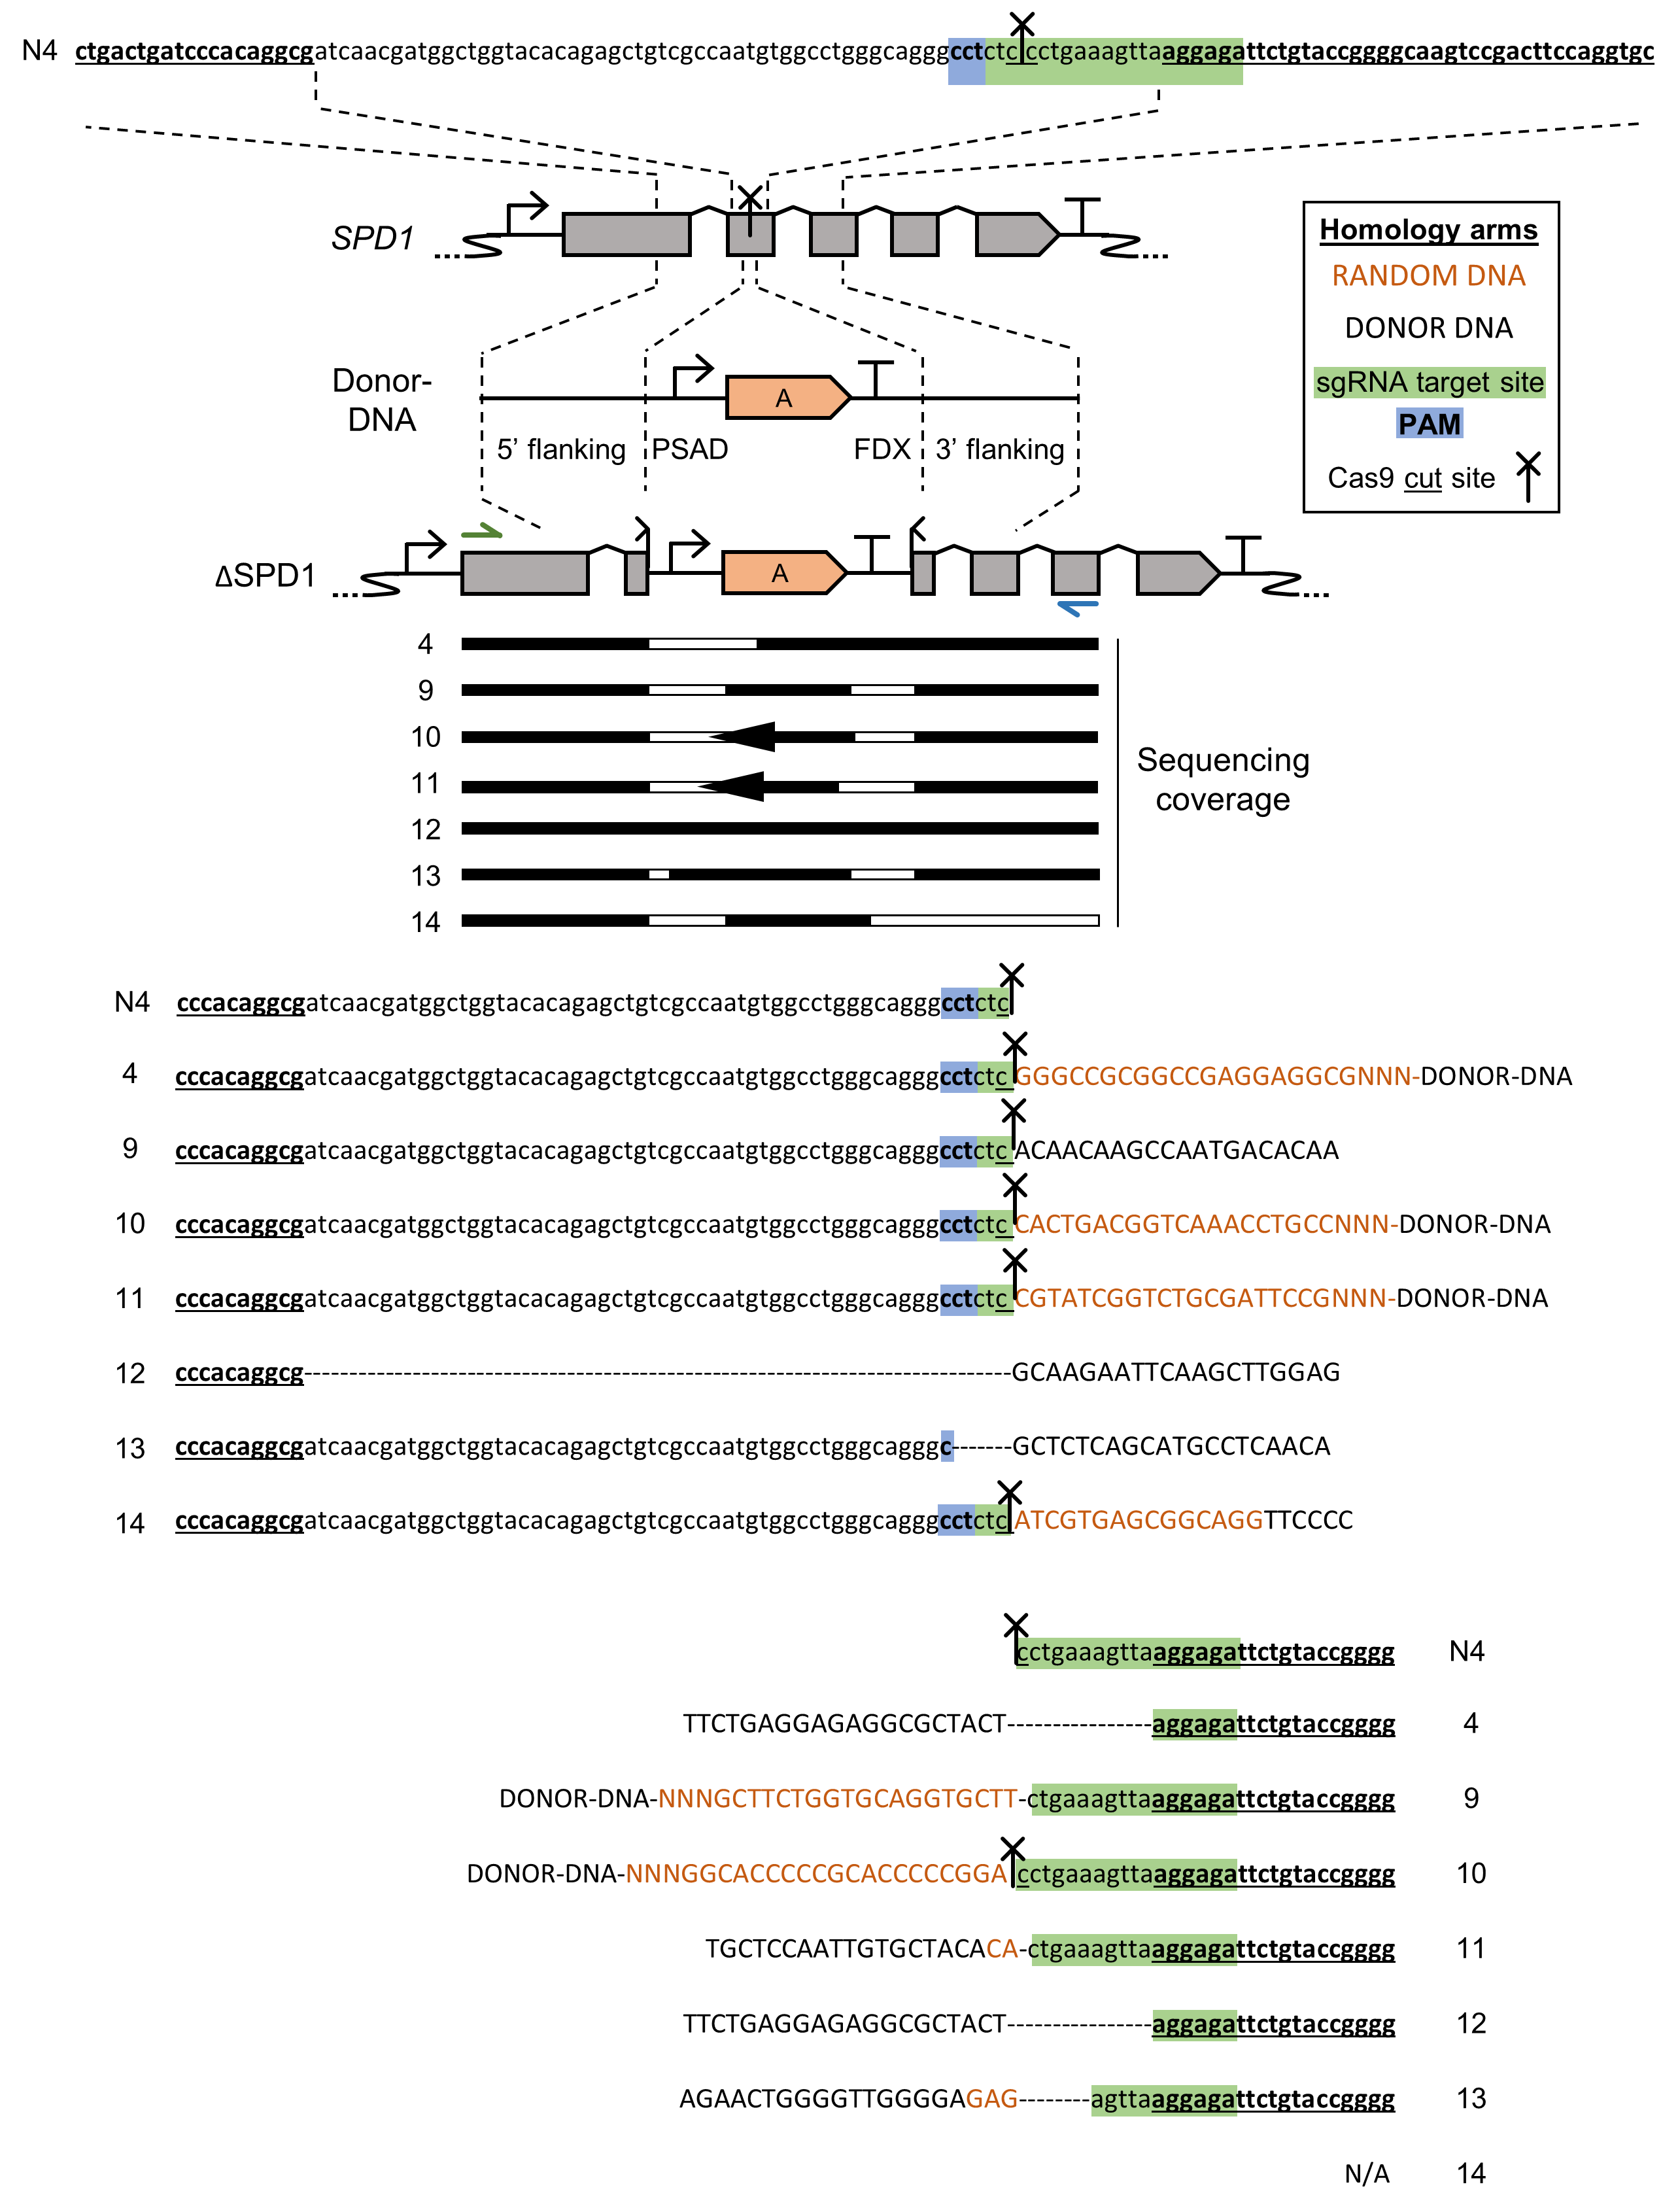


**Figure S6:** Sequencing results of the *SPD1* locus after successful Cas9 edit for seven different mutants. A hygromycin resistance cassette with homology arms was used as donor-DNA. Top to bottom: The genetic layout of the parental strain N-UVM4 is presented at the top, both in detail around the sgRNA target site and as schematic (not to scale). Primers used for PCR amplification are color coded. Results are available for the green and blue primer combination. The *SPD1* locus edited via homologous recombination is depicted as well as sequencing coverage of the three PCR products. Arrows indicate a reverse orientation of the repair template. For the sgRNA target region, the sequencing results are displayed in detail at the bottom.


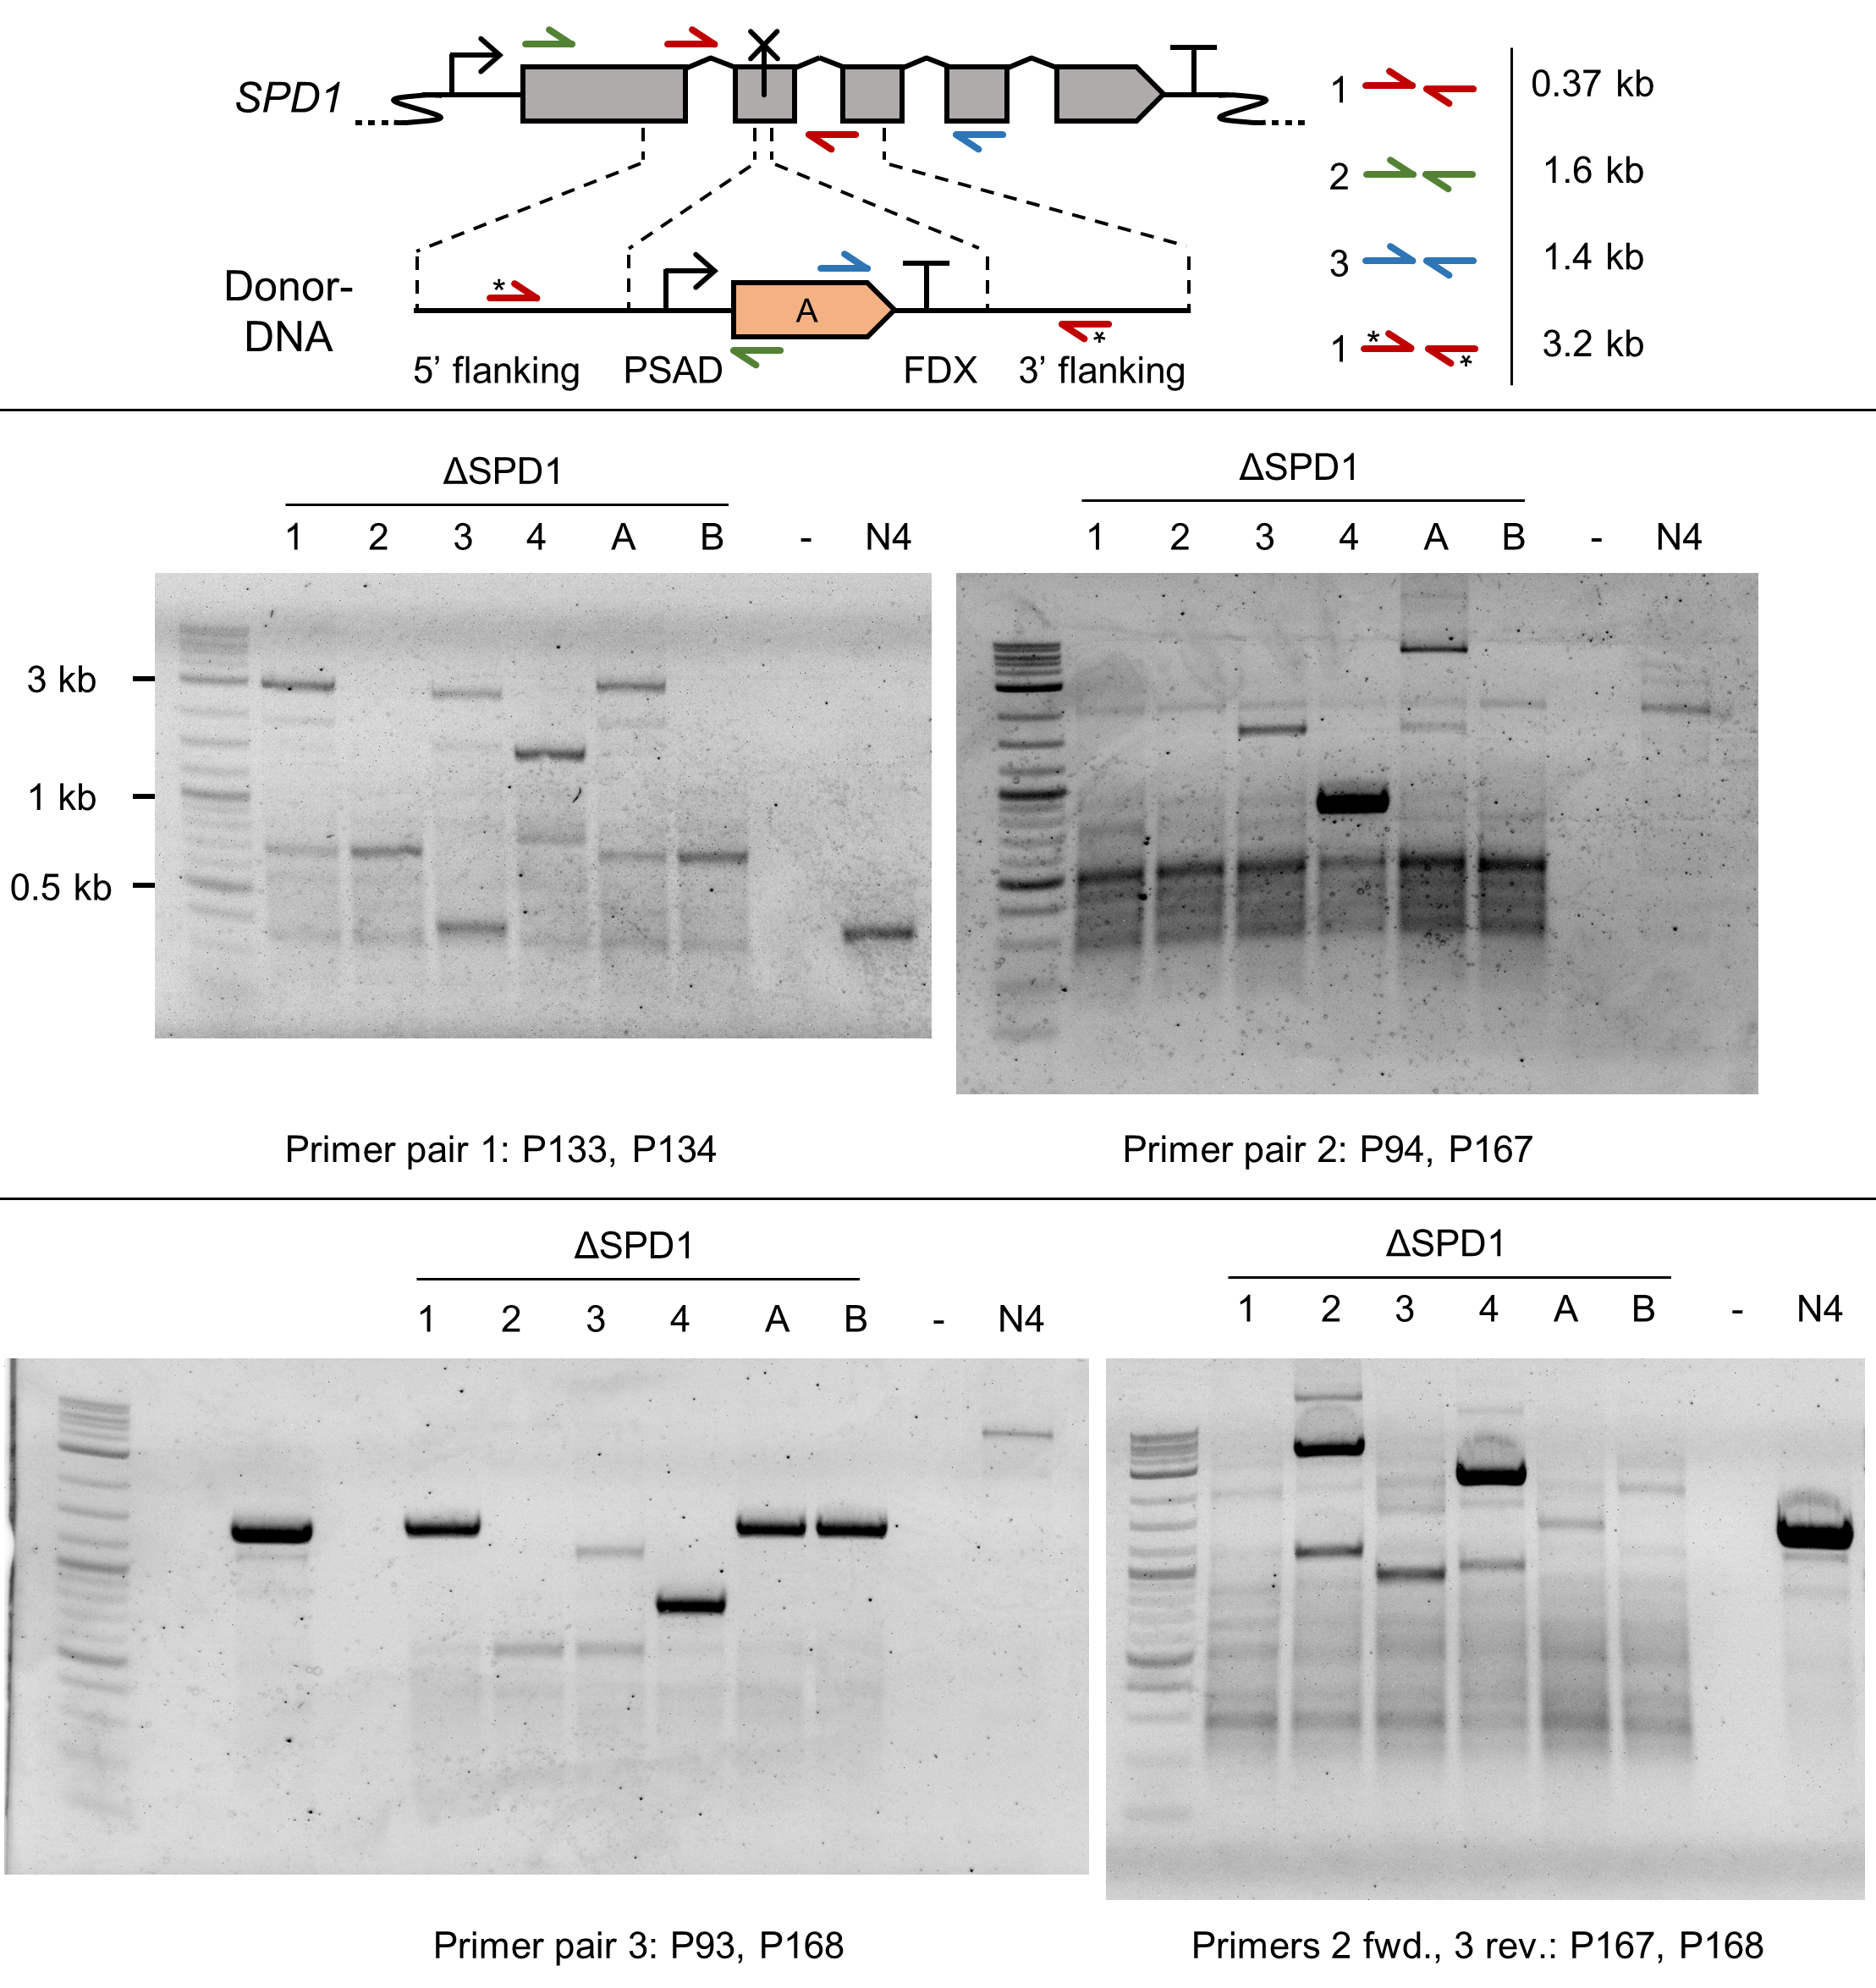


**Figure S7:** Agarose gels after cPCR of ΔSPD1 mutants using indicated primers. (N4: N-UVM4 parental strain)


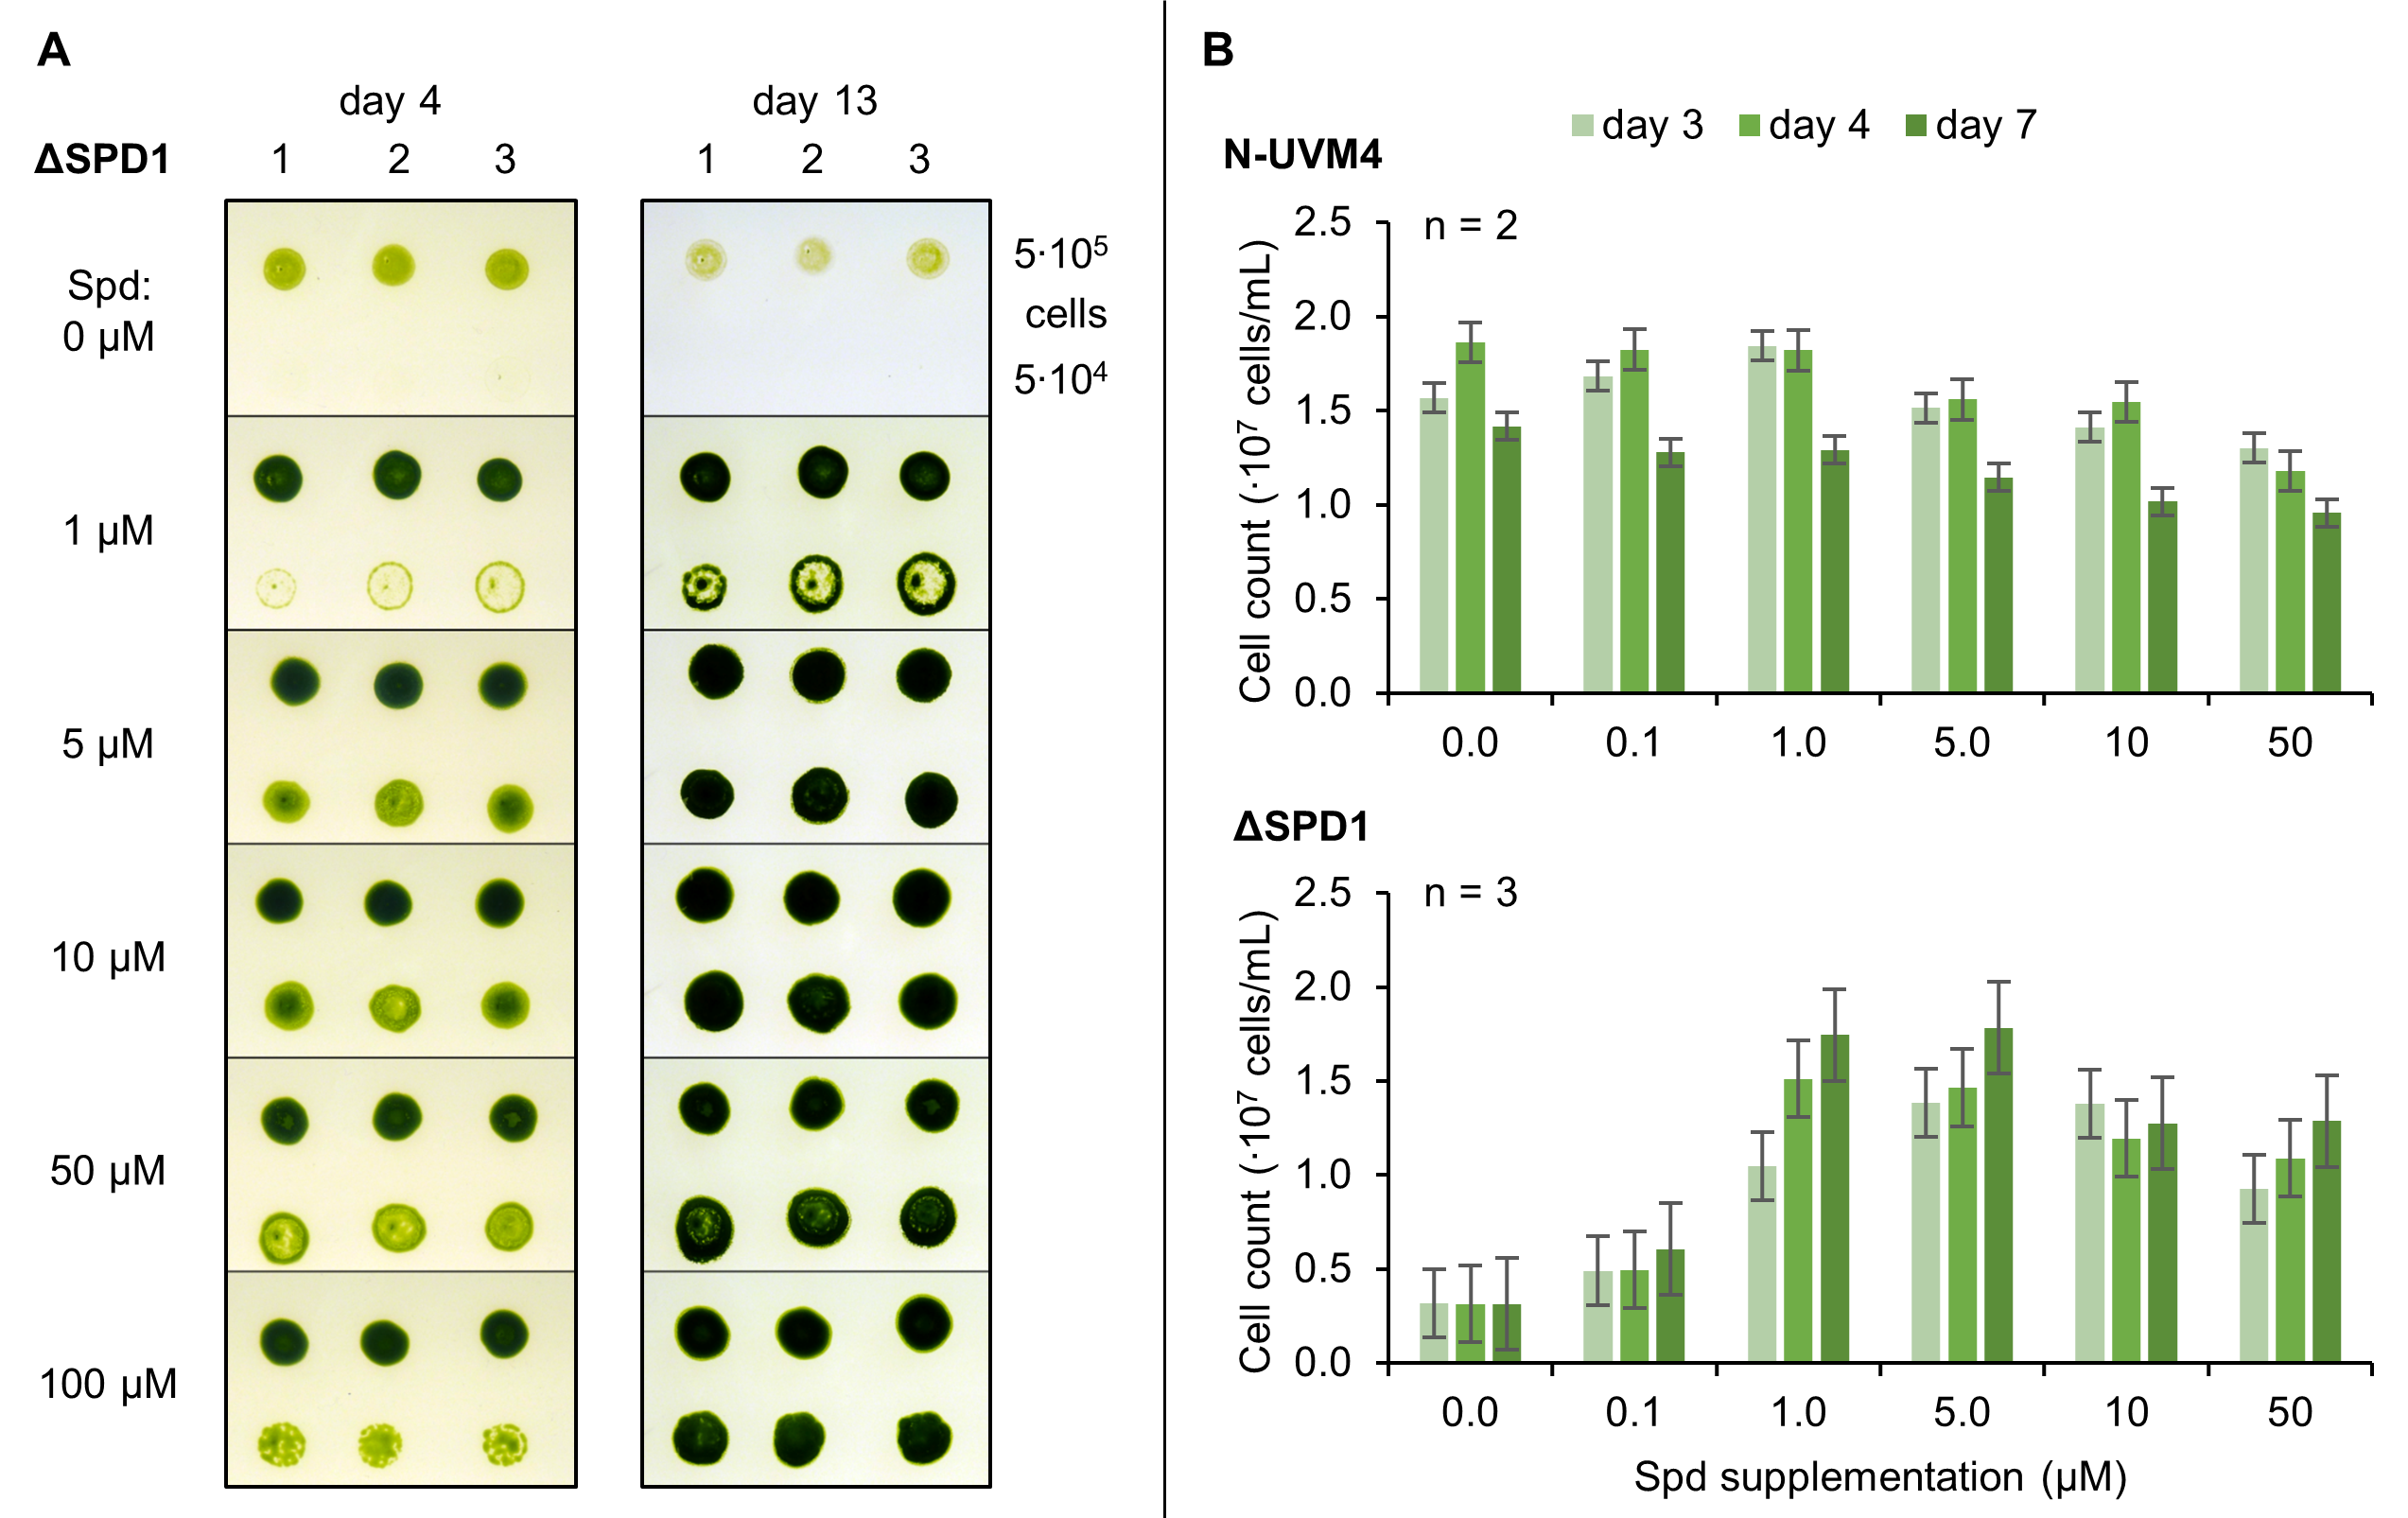


**Figure S8:** Spermidine supplementation requirements of the ΔSPD1 mutant. (**A**) Growth of three ΔSPD1 mutants on solid TAP medium containing indicated amounts of spermidine. 20 µL of cell suspension containing a total of about 500.000 and 50.000 cells respectively was spotted onto the plates and pictures were taken four and 13 days later. (**B**) Cell concentration of the N-UVM4 parental strain (top) and three ΔSPD1 mutants (bottom) in liquid TAP medium containing indicated amounts of spermidine three, four and seven days after inoculation. Error bars represent the standard deviation of biological replicates as indicated. (Spd: spermidine)

**
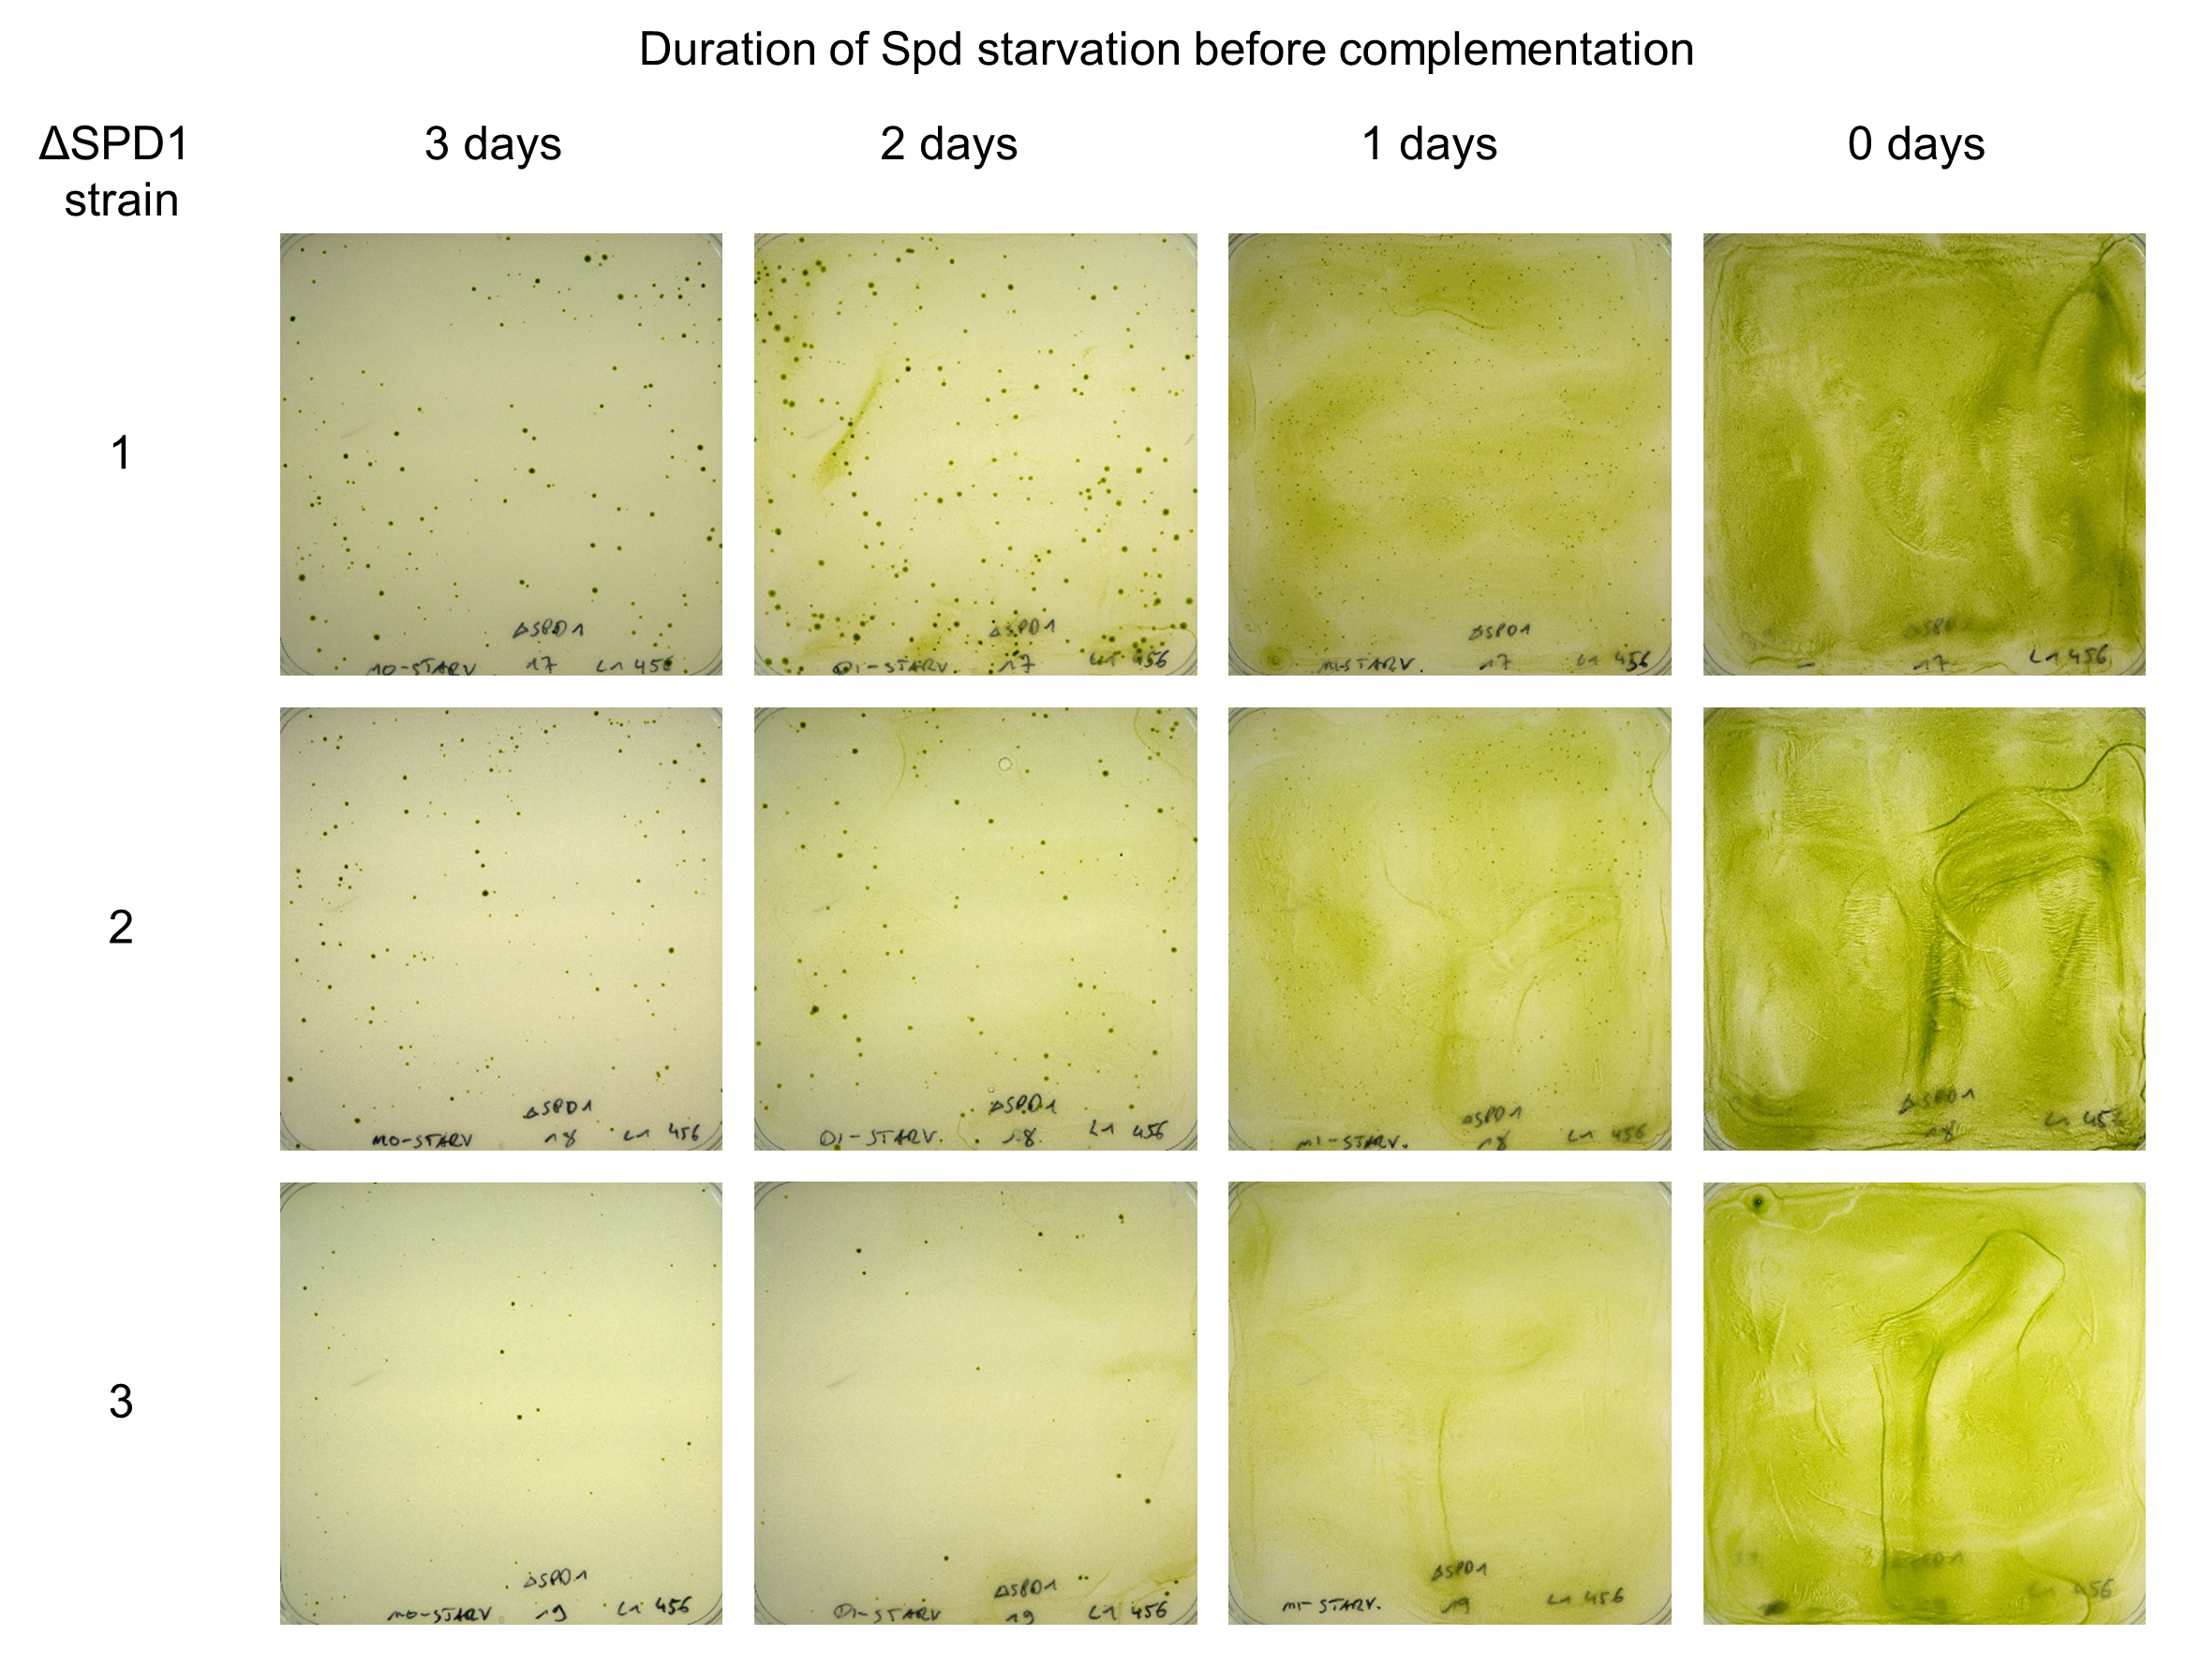
**

**Figure S9:** Effect of spermidine starvation prior to complementation of the ΔSPD1 mutation. Cells were transferred to spermidine-less medium and kept in exponential growth phase for the indicated amount of days prior to transformation with construct II. Pictures were taken five days after plating.


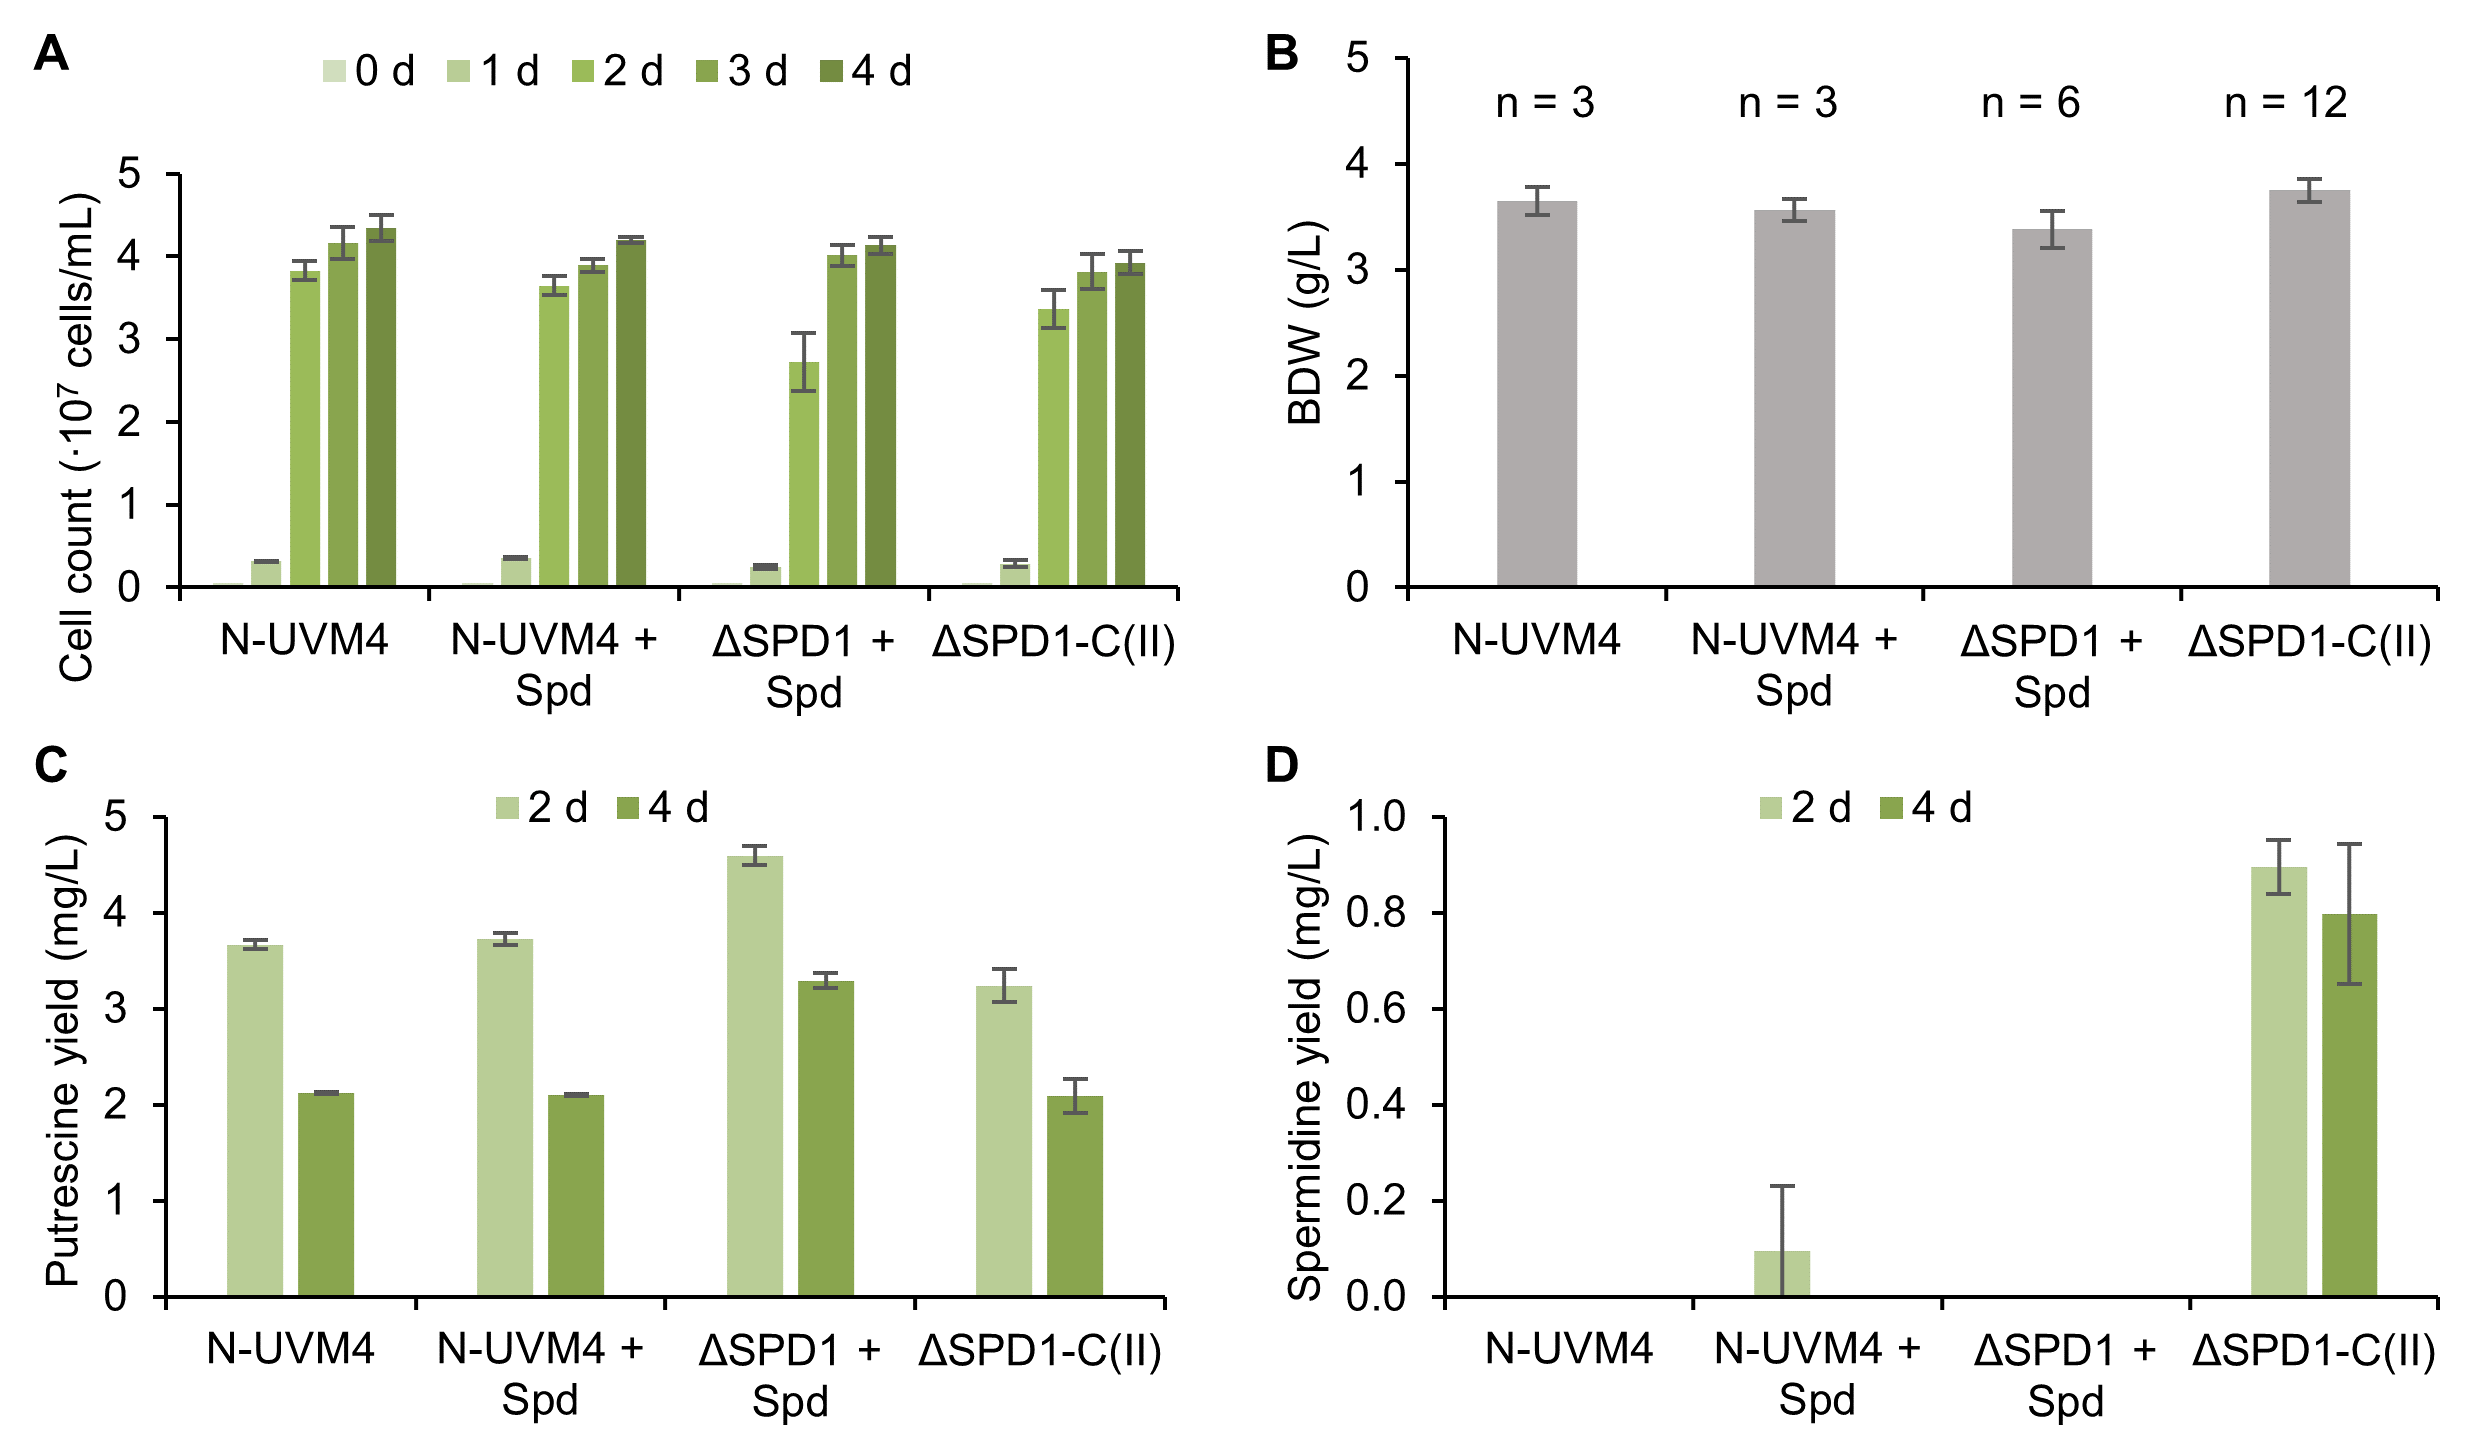


**Figure S10:** Autotrophic growth performance of six ΔSPD1 mutant strains compared to complemented and parental strains in T2P with CO2 gassing. Three *SPD1* knockout strains were complemented using construct II, of which four progenitor strains were cultivated each. (**A**) Cell concentration over the course of the cultivation. (**B**) Biomass dry weight at day four. (**C**) Volumetric putrescine (left) and spermidine (right) yields of the cellular fraction at day two and four. For missing columns, yields were below the limit of detection. Error bars represent the standard deviation of indicated biological replicates.

**
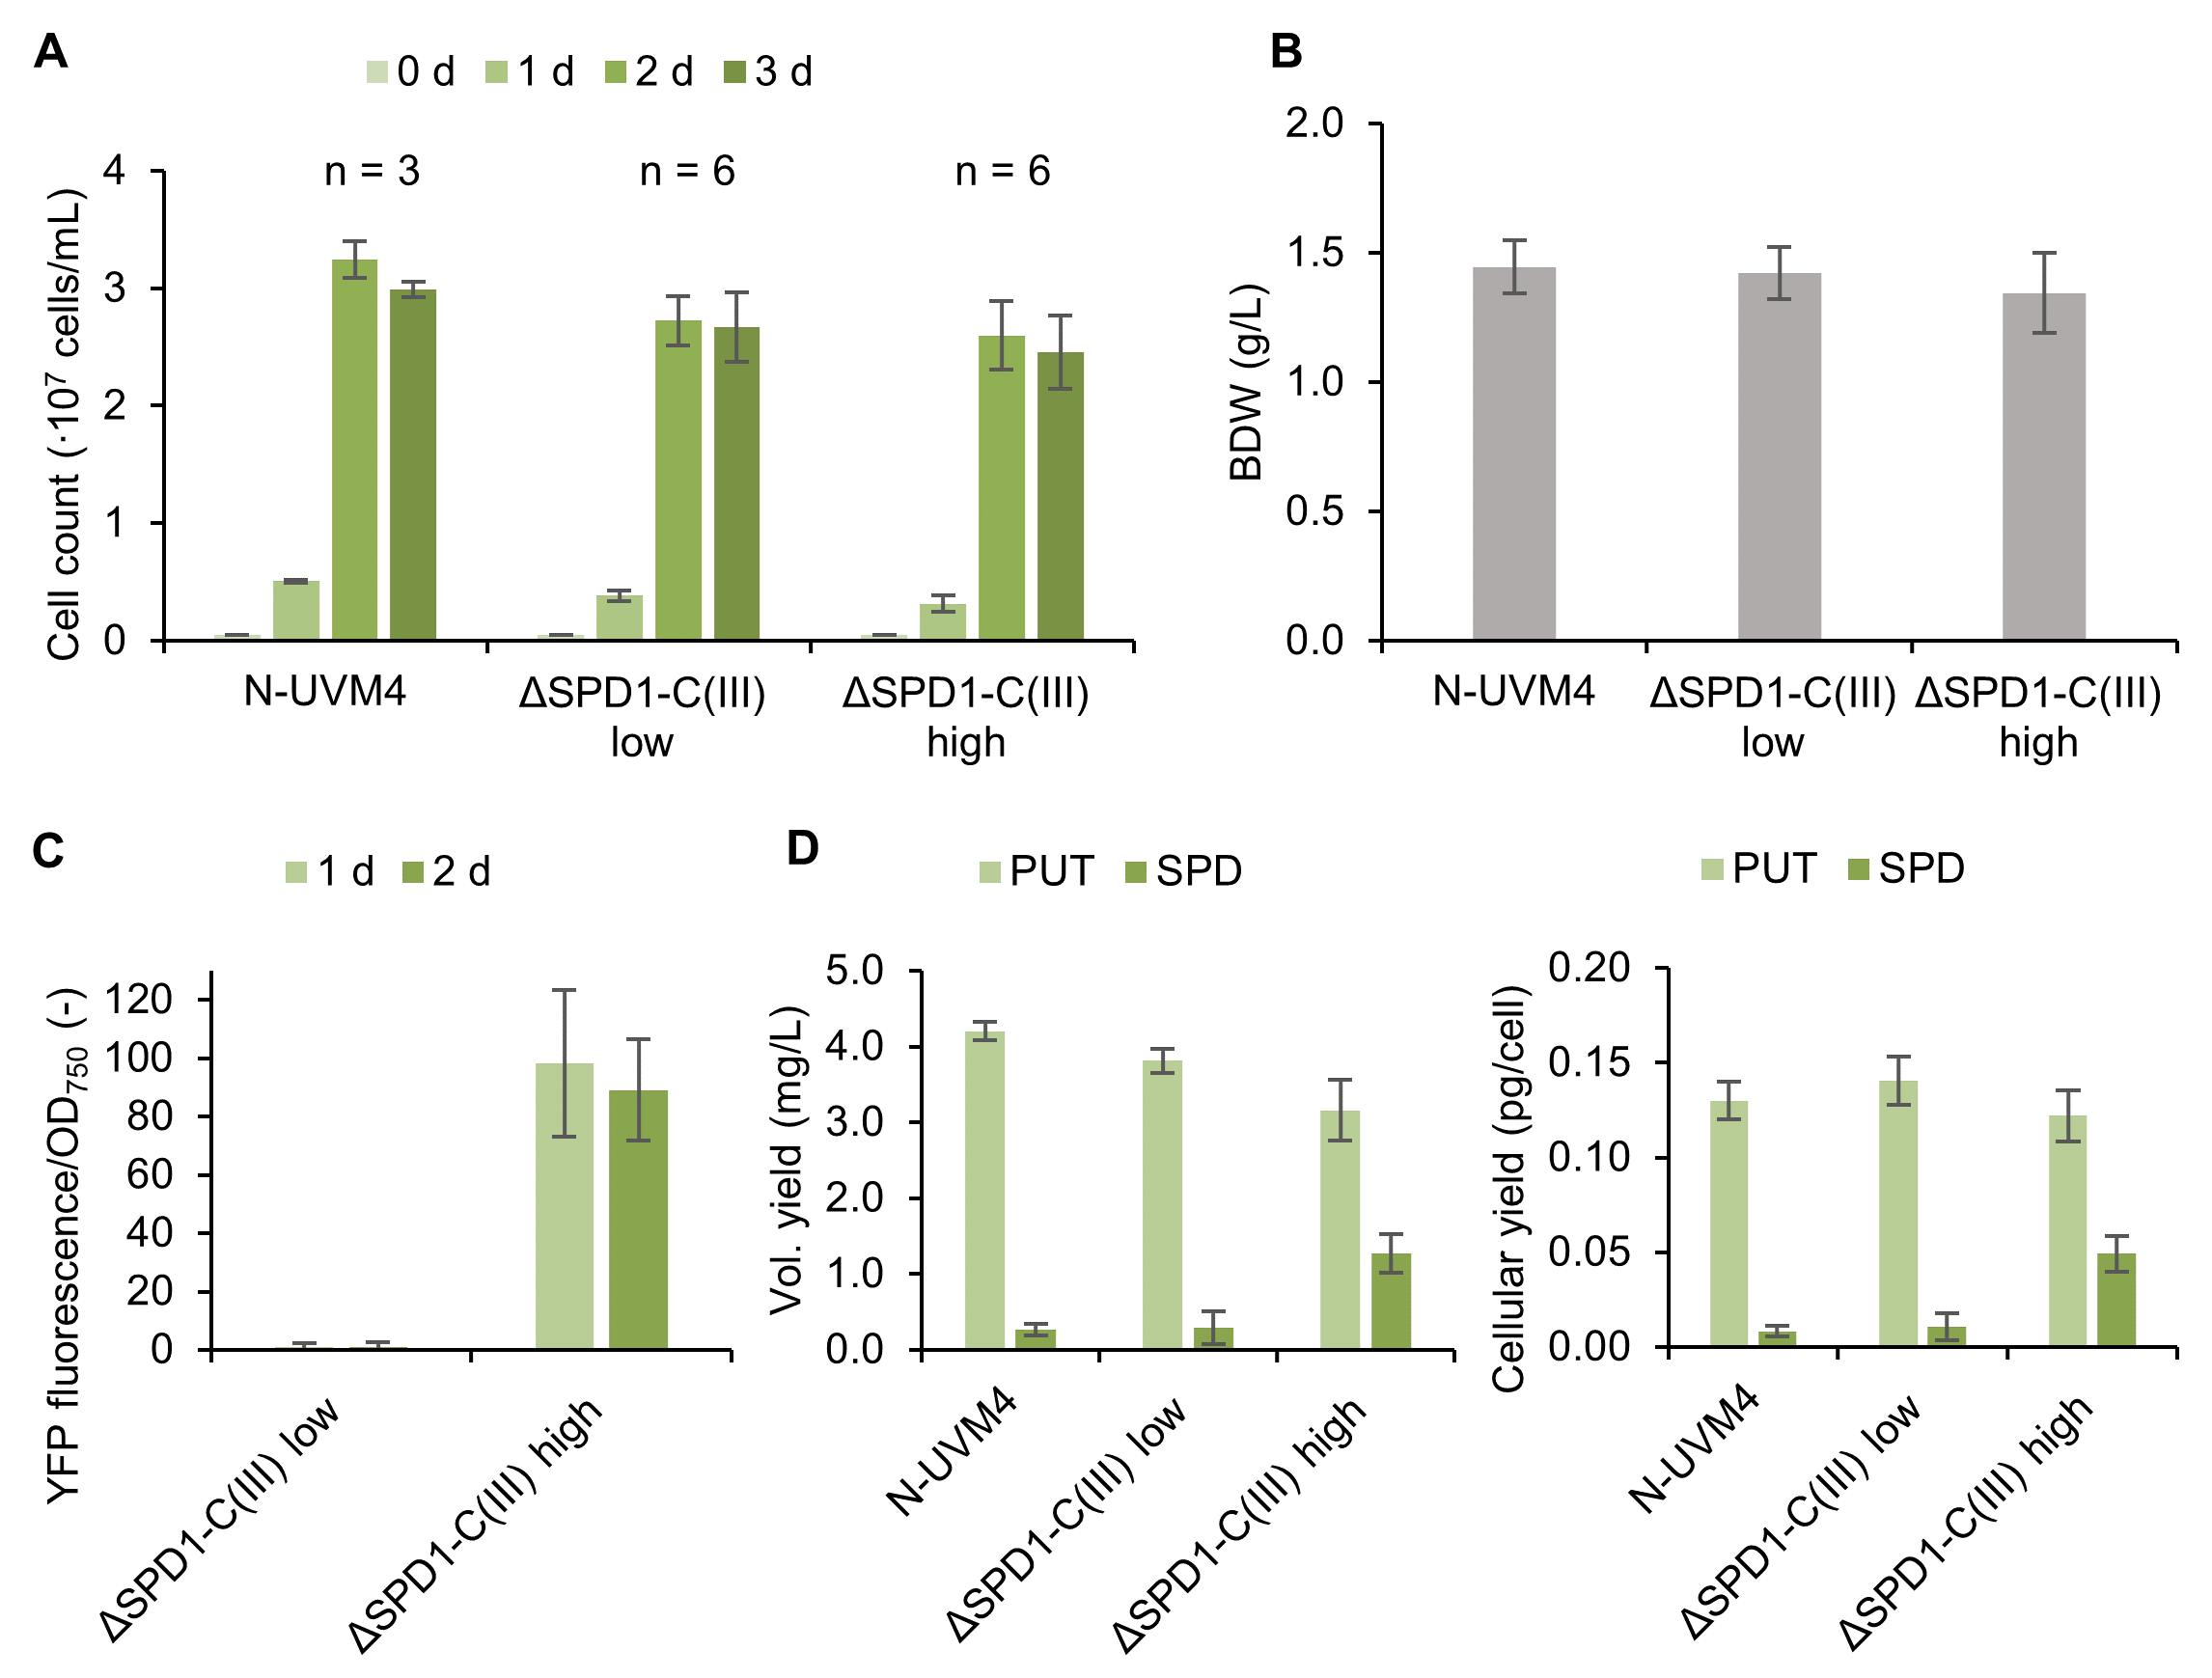
**

**Figure S11:** Mixotrophic growth performance of strains with low and high levels of SPD1-YFP expression compared to the strain N-UVM4. Three *SPD1* knockout strains were complemented using construct III, of which two progenitor strains were cultivated each. (**A**) Cell concentration over the course of the cultivation. (**B**) Biomass dry weight at day three. (**C**) OD-based YFP fluorescence levels at day one and two. (**D**) Volumetric (left) and cellular (right) putrescine and spermidine yields of the cellular fraction at day two. Error bars represent the standard deviation of indicated biological replicates.
